# Supplementary material for: Potential use of noncoding RNAs and innovative therapeutic strategies to target the 5’UTR of SARS-CoV-2
Source: PubMed Central journal article supplement (PMC7466951; doi:10.2217/epi-2020-0162), 2020-09-02
Supplement: epi-2020-0162-supp-table-1.pdf [file epi-2020-0162-supp-table-1.pdf]

Reference sequence (1): AP006557.1\_SARS\_coronavirus\_TWH\_genomic\_RNA\_complete\_genome
Identities normalised by aligned length.
Colored by: identity

Table with columns: ID, Name, cov, pid, and sequence alignment. The table lists 114 SARS coronavirus genomic RNA complete genomes with their coverage and identity percentages, followed by a detailed sequence alignment with a reference sequence.

Table with columns: ID, Name, cov, pid, and sequence alignment. This table continues the list of SARS coronavirus genomic RNA complete genomes, showing IDs 1 through 114 and their corresponding coverage and identity data.





| Accession | Sequence ID  | From                                                                               | Patent      | Genome Type     | Consensus      | Cov    | Pid    | 321                                  | 4                             | 400          |
|-----------|--------------|------------------------------------------------------------------------------------|-------------|-----------------|----------------|--------|--------|--------------------------------------|-------------------------------|--------------|
| 111       | CQ918584.1   | Sequence_1                                                                         | From Patent | NC_0200409684.2 | 100.0%         | 95.0%  | 95.0%  | GTGTTCAGTGCATCATCAGCATACTAGGTTTCTGTC | CGGGTGTGACCGAAGGTAAGTGGAGAGCC | TGTTCTTGTGTT |
| 112       | CQ918585.1   | Sequence_2                                                                         | From Patent | NC_0200409684.2 | 100.0%         | 95.0%  | 95.0%  | GTGTTCAGTGCATCATCAGCATACTAGGTTTCTGTC | CGGGTGTGACCGAAGGTAAGTGGAGAGCC | TGTTCTTGTGTT |
| 113       | CQ918598.1   | Sequence_15                                                                        | From Patent | NC_0200409684.2 | 100.0%         | 100.0% | 100.0% | GTGTTCAGTGCATCATCAGCATACTAGGTTTCTGTC | CGGGTGTGACCGAAGGTAAGTGGAGAGCC | TGTTCTTGTGTT |
| 114       | NC_0204718.3 | SARS_coronavirus_complete_genome                                                   |             |                 | consensus/100% | 100.0% | 100.0% | GTGTTCAGTGCATCATCAGCATACTAGGTTTCTGTC | CGGGTGTGACCGAAGGTAAGTGGAGAGCC | TGTTCTTGTGTT |
|           |              |                                                                                    |             |                 | consensus/90%  |        |        | .....GACCGAAGGTAAGT.....             |                               |              |
|           |              |                                                                                    |             |                 | consensus/80%  |        |        | GTGTTCAGTGCATCATCAGCATACTAGGTTTCTGTC | CGGGTGTGACCGAAGGTAAGTGGAGAGCC | TGTTCTTGTGTT |
|           |              |                                                                                    |             |                 | consensus/70%  |        |        | GTGTTCAGTGCATCATCAGCATACTAGGTTTCTGTC | CGGGTGTGACCGAAGGTAAGTGGAGAGCC | TGTTCTTGTGTT |
| 1         | AP006557.1   | SARS_coronavirus_TWH_genomic_RNA_complete_genome                                   |             |                 | 100.0%         | 100.0% |        | TCAACGAGAAAAACA                      |                               |              |
| 2         | AP006558.1   | SARS_coronavirus_TWJ_genomic_RNA_complete_genome                                   |             |                 | 100.0%         | 100.0% |        | TCAACGAGAAAAACA                      |                               |              |
| 3         | AP006559.1   | SARS_coronavirus_TWK_genomic_RNA_complete_genome                                   |             |                 | 100.0%         | 100.0% |        | TCAACGAGAAAAACA                      |                               |              |
| 4         | AP006560.1   | SARS_coronavirus_TWS_genomic_RNA_complete_genome                                   |             |                 | 100.0%         | 100.0% |        | TCAACGAGAAAAACA                      |                               |              |
| 5         | AP006561.1   | SARS_coronavirus_TWY_genomic_RNA_complete_genome                                   |             |                 | 100.0%         | 100.0% |        | TCAACGAGAAAAACA                      |                               |              |
| 6         | AY274119.3   | Severe_acute_respiratory_syndrome-related_coronavirus_isolate_Tor2_complete_genome |             |                 | 100.0%         | 100.0% |        | TCAACGAGAAAAACA                      |                               |              |
| 7         | AY278487.3   | SARS_coronavirus_BJ02_complete_genome                                              |             |                 | 100.0%         | 100.0% |        | TCAACGAGAAAAACA                      |                               |              |
| 8         | AY278488.2   | SARS_coronavirus_BJ01_complete_genome                                              |             |                 | 93.7%          | 93.7%  |        | TCAACGAGAAAAACA                      |                               |              |
| 9         | AY278489.2   | SARS_coronavirus_BJ03_complete_genome                                              |             |                 | 94.7%          | 94.7%  |        | TCAACGAGAAAAACA                      |                               |              |
| 10        | AY278490.3   | SARS_coronavirus_BJ03_complete_genome                                              |             |                 | 98.7%          | 98.7%  |        | TCAACGAGAAAAACA                      |                               |              |
| 11        | AY278491.2   | SARS_coronavirus_HKU-39849_complete_genome                                         |             |                 | 100.0%         | 100.0% |        | TCAACGAGAAAAACA                      |                               |              |
| 12        | AY278554.2   | SARS_coronavirus_CUHK-WI_complete_genome                                           |             |                 | 95.0%          | 95.0%  |        | TCAACGAGAAAAACA                      |                               |              |
| 13        | AY278741.1   | SARS_coronavirus_Urbani_complete_genome                                            |             |                 | 100.0%         | 100.0% |        | TCAACGAGAAAAACA                      |                               |              |
| 14        | AY279354.2   | SARS_coronavirus_BJ04_complete_genome                                              |             |                 | 94.7%          | 94.7%  |        | TCAACGAGAAAAACA                      |                               |              |
| 15        | AY282752.2   | SARS_coronavirus_CUHK-Su10_complete_genome                                         |             |                 | 95.0%          | 95.0%  |        | TCAACGAGAAAAACA                      |                               |              |
| 16        | AY283794.1   | SARS_coronavirus_Sin2500_complete_genome                                           |             |                 | 94.7%          | 94.7%  |        | TCAACGAGAAAAACA                      |                               |              |
| 17        | AY283795.1   | SARS_coronavirus_Sin2677_complete_genome                                           |             |                 | 94.7%          | 94.7%  |        | TCAACGAGAAAAACA                      |                               |              |
| 18        | AY283796.1   | SARS_coronavirus_Sin2679_complete_genome                                           |             |                 | 94.7%          | 94.7%  |        | TCAACGAGAAAAACA                      |                               |              |
| 19        | AY283797.1   | SARS_coronavirus_Sin2748_complete_genome                                           |             |                 | 94.7%          | 94.7%  |        | TCAACGAGAAAAACA                      |                               |              |
| 20        | AY283798.2   | SARS_coronavirus_Sin2774_complete_genome                                           |             |                 | 94.7%          | 94.7%  |        | TCAACGAGAAAAACA                      |                               |              |
| 21        | AY291315.1   | SARS_coronavirus_Frankfurt_1_complete_genome                                       |             |                 | 100.0%         | 100.0% |        | TCAACGAGAAAAACA                      |                               |              |
| 22        | AY291451.1   | SARS_coronavirus_TW1_complete_genome                                               |             |                 | 100.0%         | 100.0% |        | TCAACGAGAAAAACA                      |                               |              |
| 23        | AY297028.1   | SARS_coronavirus_ZJ01_complete_genome                                              |             |                 | 95.3%          | 95.3%  |        | TCAACGAGAAAAACA                      |                               |              |
| 24        | AY304486.1   | SARS_coronavirus_S23_complete_genome                                               |             |                 | 95.0%          | 95.0%  |        | TCAACGAGAAAAACA                      |                               |              |
| 25        | AY304488.1   | SARS_coronavirus_S216_complete_genome                                              |             |                 | 95.0%          | 95.0%  |        | TCAACGAGAAAAACA                      |                               |              |
| 26        | AY304495.1   | SARS_coronavirus_G250_complete_genome                                              |             |                 | 95.0%          | 95.0%  |        | TCAACGAGAAAAACA                      |                               |              |
| 27        | AY310120.1   | SARS_coronavirus_FRA_complete_genome                                               |             |                 | 100.0%         | 100.0% |        | TCAACGAGAAAAACA                      |                               |              |
| 28        | AY313906.1   | SARS_coronavirus_GD69_complete_genome                                              |             |                 | 100.0%         | 100.0% |        | TCAACGAGAAAAACA                      |                               |              |
| 29        | AY321118.1   | SARS_coronavirus_TW_C_complete_genome                                              |             |                 | 100.0%         | 100.0% |        | TCAACGAGAAAAACA                      |                               |              |
| 30        | AY323977.2   | SARS_coronavirus_HSR_1_complete_genome                                             |             |                 | 100.0%         | 100.0% |        | TCAACGAGAAAAACA                      |                               |              |
| 31        | AY338174.1   | SARS_coronavirus_Taiwan_TC1_complete_genome                                        |             |                 | 77.0%          | 77.0%  |        | TCAACGAGAAAAACA                      |                               |              |
| 32        | AY338175.1   | SARS_coronavirus_Taiwan_TC2_complete_genome                                        |             |                 | 77.0%          | 77.0%  |        | TCAACGAGAAAAACA                      |                               |              |
| 33        | AY345986.1   | SARS_coronavirus_CUHK-AG01_complete_genome                                         |             |                 | 95.0%          | 95.0%  |        | TCAACGAGAAAAACA                      |                               |              |
| 34        | AY345987.1   | SARS_coronavirus_CUHK-AG02_complete_genome                                         |             |                 | 95.0%          | 95.0%  |        | TCAACGAGAAAAACA                      |                               |              |
| 35        | AY345988.1   | SARS_coronavirus_CUHK-AG03_complete_genome                                         |             |                 | 95.0%          | 95.0%  |        | TCAACGAGAAAAACA                      |                               |              |
| 36        | AY348314.1   | SARS_coronavirus_Taiwan_TC3_complete_genome                                        |             |                 | 77.0%          | 77.0%  |        | TCAACGAGAAAAACA                      |                               |              |
| 37        | AY350750.1   | SARS_coronavirus_PUM01_complete_genome                                             |             |                 | 95.7%          | 95.7%  |        | TCAACGAGAAAAACA                      |                               |              |
| 38        | AY351680.1   | SARS_coronavirus_ZW1_complete_genome                                               |             |                 | 100.0%         | 99.7%  |        | TCAACGAGAAAAACA                      |                               |              |
| 39        | AY357075.1   | SARS_coronavirus_PUM02_complete_genome                                             |             |                 | 95.3%          | 95.3%  |        | TCAACGAGAAAAACA                      |                               |              |
| 40        | AY357076.1   | SARS_coronavirus_PUM03_complete_genome                                             |             |                 | 95.3%          | 95.3%  |        | TCAACGAGAAAAACA                      |                               |              |
| 41        | AY362698.1   | SARS_coronavirus_TW_C2_complete_genome                                             |             |                 | 100.0%         | 100.0% |        | TCAACGAGAAAAACA                      |                               |              |
| 42        | AY362699.1   | SARS_coronavirus_TW_C3_complete_genome                                             |             |                 | 100.0%         | 100.0% |        | TCAACGAGAAAAACA                      |                               |              |
| 43        | AY390556.1   | SARS_coronavirus_G202_complete_genome                                              |             |                 | 100.0%         | 100.0% |        | TCAACGAGAAAAACA                      |                               |              |
| 44        | AY394850.1   | SARS_coronavirus_WH1_complete_genome                                               |             |                 | 100.0%         | 100.0% |        | TCAACGAGAAAAACA                      |                               |              |
| 45        | AY394977.1   | SARS_coronavirus_G2-A_partial_genome                                               |             |                 | 83.0%          | 83.0%  |        | TCAACGAGAAAAACA                      |                               |              |
| 46        | AY394978.1   | SARS_coronavirus_G2-B_partial_genome                                               |             |                 | 76.0%          | 76.0%  |        | TCAACGAGAAAAACA                      |                               |              |
| 47        | AY394979.1   | SARS_coronavirus_G2-C_partial_genome                                               |             |                 | 82.7%          | 82.7%  |        | TCAACGAGAAAAACA                      |                               |              |
| 48        | AY394980.1   | SARS_coronavirus_G2-D_partial_genome                                               |             |                 | 84.7%          | 84.3%  |        | TCAACGAGAAAAACA                      |                               |              |
| 49        | AY394981.1   | SARS_coronavirus_H2-B1A_partial_genome                                             |             |                 | 84.7%          | 84.3%  |        | TCAACGAGAAAAACA                      |                               |              |
| 50        | AY394982.1   | SARS_coronavirus_H2-B1B_partial_genome                                             |             |                 | 82.7%          | 82.7%  |        | TCAACGAGAAAAACA                      |                               |              |
| 51        | AY394983.1   | SARS_coronavirus_H2-B2_A_complete_genome                                           |             |                 | 82.7%          | 82.7%  |        | TCAACGAGAAAAACA                      |                               |              |
| 52        | AY394984.1   | SARS_coronavirus_H2-B2_B_partial_genome                                            |             |                 | 84.3%          | 84.3%  |        | TCAACGAGAAAAACA                      |                               |              |
| 53        | AY394985.1   | SARS_coronavirus_H2-B2_FB_complete_genome                                          |             |                 | 16.7%          | 16.7%  |        | TCAACGAGAAAAACA                      |                               |              |
| 54        | AY394986.1   | SARS_coronavirus_H2-B2_Cb_complete_genome                                          |             |                 | 83.0%          | 83.0%  |        | TCAACGAGAAAAACA                      |                               |              |
| 55        | AY394987.1   | SARS_coronavirus_H2-B2_Fc_complete_genome                                          |             |                 | 86.0%          | 86.0%  |        | TCAACGAGAAAAACA                      |                               |              |
| 56        | AY394988.1   | SARS_coronavirus_JMD_partial_genome                                                |             |                 | 71.3%          | 71.0%  |        | TCAACGAGAAAAACA                      |                               |              |
| 57        | AY394989.1   | SARS_coronavirus_H2S2-B_complete_genome                                            |             |                 | 95.0%          | 95.0%  |        | TCAACGAGAAAAACA                      |                               |              |
| 58        | AY394990.1   | SARS_coronavirus_H2S2-E_complete_genome                                            |             |                 | 95.0%          | 95.0%  |        | TCAACGAGAAAAACA                      |                               |              |
| 59        | AY394991.1   | SARS_coronavirus_H2S2-Fc_complete_genome                                           |             |                 | 95.0%          | 95.0%  |        | TCAACGAGAAAAACA                      |                               |              |
| 60        | AY394992.1   | SARS_coronavirus_H2S2-C_complete_genome                                            |             |                 | 95.0%          | 95.0%  |        | TCAACGAGAAAAACA                      |                               |              |
| 61        | AY394993.1   | SARS_coronavirus_H2S2-L2_complete_genome                                           |             |                 | 95.0%          | 95.0%  |        | TCAACGAGAAAAACA                      |                               |              |
| 62        | AY394994.1   | SARS_coronavirus_H2S2-Bc_complete_genome                                           |             |                 | 95.0%          | 95.0%  |        | TCAACGAGAAAAACA                      |                               |              |
| 63        | AY394995.1   | SARS_coronavirus_H2S2-Cc_complete_genome                                           |             |                 | 95.0%          | 95.0%  |        | TCAACGAGAAAAACA                      |                               |              |
| 64        | AY394996.1   | SARS_coronavirus_ZS-B_complete_genome                                              |             |                 | 95.0%          | 95.0%  |        | TCAACGAGAAAAACA                      |                               |              |
| 65        | AY394997.1   | SARS_coronavirus_ZS-A_complete_genome                                              |             |                 | 95.0%          | 95.0%  |        | TCAACGAGAAAAACA                      |                               |              |
| 66        | AY394998.1   | SARS_coronavirus_LC1_complete_genome                                               |             |                 | 95.0%          | 95.0%  |        | TCAACGAGAAAAACA                      |                               |              |
| 67        | AY394999.1   | SARS_coronavirus_LC2_complete_genome                                               |             |                 | 95.0%          | 95.0%  |        | TCAACGAGAAAAACA                      |                               |              |
| 68        | AY395000.1   | SARS_coronavirus_LC3_complete_genome                                               |             |                 | 95.0%          | 95.0%  |        | TCAACGAGAAAAACA                      |                               |              |
| 69        | AY395001.1   | SARS_coronavirus_LC4_complete_genome                                               |             |                 | 95.0%          | 95.0%  |        | TCAACGAGAAAAACA                      |                               |              |
| 70        | AY395002.1   | SARS_coronavirus_LC5_complete_genome                                               |             |                 | 95.0%          | 95.0%  |        | TCAACGAGAAAAACA                      |                               |              |
| 71        | AY395003.1   | SARS_coronavirus_ZS-C_complete_genome                                              |             |                 | 83.0%          | 83.0%  |        | TCAACGAGAAAAACA                      |                               |              |
| 72        | AY395004.1   | SARS_coronavirus_H2S2-Bb_partial_genome                                            |             |                 | 84.3%          | 84.3%  |        | TCAACGAGAAAAACA                      |                               |              |
| 73        | AY427439.1   | SARS_coronavirus_AS_complete_genome                                                |             |                 | 94.7%          | 94.7%  |        | TCAACGAGAAAAACA                      |                               |              |
| 74        | AY461660.1   | SARS_coronavirus_SoJ_complete_genome                                               |             |                 | 95.0%          | 94.7%  |        | TCAACGAGAAAAACA                      |                               |              |
| 75        | AY463059.1   | SARS_coronavirus_ShanghaiQXC1_complete_genome                                      |             |                 | 73.7%          | 73.7%  |        | TCAACGAGAAAAACA                      |                               |              |
| 76        | AY463060.1   | SARS_coronavirus_ShanghaiQXC2_complete_genome                                      |             |                 | 73.7%          | 73.7%  |        | TCAACGAGAAAAACA                      |                               |              |
| 77        | AY485277.1   | SARS_coronavirus_Sin11-01_complete_genome                                          |             |                 | 100.0%         | 100.0% |        | TCAACGAGAAAAACA                      |                               |              |
| 78        | AY485278.1   | SARS_coronavirus_Sin03-11_complete_genome                                          |             |                 | 100.0%         | 100.0% |        | TCAACGAGAAAAACA                      |                               |              |
| 79        | AY502923.1   | SARS_coronavirus_TW10_complete_genome                                              |             |                 | 100.0%         | 100.0% |        | TCAACGAGAAAAACA                      |                               |              |
| 80        | AY502924.1   | SARS_coronavirus_TW11_complete_genome                                              |             |                 | 100.0%         | 100.0% |        | TCAACGAGAAAAACA                      |                               |              |
| 81        | AY502925.1   | SARS_coronavirus_TW2_complete_genome                                               |             |                 | 100.0%         | 100.0% |        | TCAACGAGAAAAACA                      |                               |              |
| 82        | AY502926.1   | SARS_coronavirus_TW3_complete_genome                                               |             |                 | 100.0%         | 100.0% |        | TCAACGAGAAAAACA                      |                               |              |
| 83        | AY502927.1   | SARS_coronavirus_TW4_complete_genome                                               |             |                 | 100.0%         | 100.0% |        | TCAACGAGAAAAACA                      |                               |              |
| 84        | AY502928.1   | SARS_coronavirus_TW5_complete_genome                                               |             |                 | 100.0%         | 100.0% |        | TCAACGAGAAAAACA                      |                               |              |
| 85        | AY502929.1   | SARS_coronavirus_TW6_complete_genome                                               |             |                 | 100.0%         | 100.0% |        | TCAACGAGAAAAACA                      |                               |              |
| 86        | AY502930.1   | SARS_coronavirus_TW7_complete_genome                                               |             |                 | 100.0%         | 100.0% |        | TCAACGAGAAAAACA                      |                               |              |
| 87        | AY502931.1   | SARS_coronavirus_TW8_complete_genome                                               |             |                 | 100.0%         | 100.0% |        | TCAACGAGAAAAACA                      |                               |              |
| 88        | AY502932.1   | SARS_coronavirus_TW9_complete_genome                                               |             |                 | 100.0%         | 100.0% |        | TCAACGAGAAAAACA                      |                               |              |
| 89        | AY508704.1   | SARS_coronavirus_SNS1_complete_genome                                              |             |                 | 94.7%          | 94.7%  |        | TCAACGAGAAAAACA                      |                               |              |
| 90        | AY559081.1   | SARS_coronavirus_Sin842_complete_genome                                            |             |                 | 95.7%          | 95.3%  |        | TCAACGAGAAAAACA                      |                               |              |
| 91        | AY559082.1   | SARS_coronavirus_Sin852_complete_genome                                            |             |                 | 99.7%          | 96.3%  |        | TCAACGAGAAAAACA                      |                               |              |
| 92        | AY559083.1   | SARS_coronavirus_Sin3408_complete_genome                                           |             |                 | 88.7%          | 85.3%  |        | TCAACGAGAAAAACA                      |                               |              |
| 93        | AY559084.1   | SARS_coronavirus_Sin765V_complete_genome                                           |             |                 | 94.7%          | 94.7%  |        | TCAACGAGAAAAACA                      |                               |              |
| 94        | AY559085.1   | SARS_coronavirus_Sin848_complete_genome                                            |             |                 | 94.7%          | 94.7%  |        | TCAACGAGAAAAACA                      |                               |              |
| 95        | AY559086.1   | SARS_coronavirus_Sin849_complete_genome                                            |             |                 | 94.7%          | 94.7%  |        | TCAACGAGAAAAACA                      |                               |              |
| 96        | AY559087.1   | SARS_coronavirus_Sin3725V_complete_genome                                          |             |                 | 94.7%          | 94.7%  |        | TCAACGAGAAAAACA                      |                               |              |
| 97        | AY559088.1   | SARS_coronavirus_SinP1_complete_genome                                             |             |                 | 94.7%          | 94.7%  |        | TCAACGAGAAAAACA                      |                               |              |
| 98        | AY559089.1   | SARS_coronavirus_SinP2_complete_genome                                             |             |                 | 94.7%          | 94.7%  |        | TCAACGAGAAAAACA                      |                               |              |
| 99        | AY559090.1   | SARS_coronavirus_SinP3_complete_genome                                             |             |                 | 95.3%          | 92.7%  |        | TCAACGAGAAAAACA                      |                               |              |
| 100       | AY559091.1   | SARS_coronavirus_SinP4_complete_genome                                             |             |                 | 94.7%          | 94.7%  |        | TCAACGAGAAAAACA                      |                               |              |
| 101       | AY559092.1   | SARS_coronavirus_SinP5_complete_genome                                             |             |                 | 94.7%          | 94.7%  |        | TCAACGAGAAAAACA                      |                               |              |
| 102       | AY559093.1   | SARS_coronavirus_Sin845_complete_genome                                            |             |                 | 94.7%          | 94.7%  |        | TCAACGAGAAAAACA                      |                               |              |
| 103       | AY559094.1   | SARS_coronavirus_Sin846_complete_genome                                            |             |                 | 94.7%          | 94.7%  |        | TCAACGAGAAAAACA                      |                               |              |
| 104       | AY559095.1   | SARS_coronavirus_Sin847_complete_genome                                            |             |                 | 96.7%          | 96.0%  |        | TCAACGAGAAAAACA                      |                               |              |
| 105       | AY559096.1   | SARS_coronavirus_Sin850_complete_genome                                            |             |                 | 97.3%          | 95.7%  |        | TCAACGAGAAAAACA                      |                               |              |
| 106       | AY559097.1   | SARS_coronavirus_Sin3408L_complete_genome                                          |             |                 | 94.7%          | 94.7%  |        | TCAACGAGAAAAACA                      |                               |              |
| 107       | AY595412.1   | SARS_coronavirus_LLJ-2004_complete_genome                                          |             |                 | 93.0%          | 93.0%  |        | TCAACGAGAAAAACA                      |                               |              |
| 108       | AY654624.1   | SARS_coronavirus_TJF_complete_genome                                               |             |                 | 99.7%          | 99.0%  |        |                                      |                               |              |



|     |                                                           |        |        |       |
|-----|-----------------------------------------------------------|--------|--------|-------|
| 69  | AY395001.1_SARS_coronavirus_LC4_complete_genome           | 95.0%  | 95.0%  | ----- |
| 70  | AY395002.1_SARS_coronavirus_LC5_complete_genome           | 95.0%  | 95.0%  | ----- |
| 71  | AY395003.1_SARS_coronavirus_ZS-C_complete_genome          | 83.0%  | 83.0%  | ----- |
| 72  | AY395004.1_SARS_coronavirus_HSZ2-Bb_partial_genome        | 84.3%  | 84.3%  | ----- |
| 73  | AY427439.1_SARS_coronavirus_AS_complete_genome            | 94.7%  | 94.7%  | ----- |
| 74  | AY461660.1_SARS_coronavirus_SoD_complete_genome           | 95.0%  | 94.7%  | ----- |
| 75  | AY463059.1_SARS_coronavirus_ShanghaiQXC1_complete_genome  | 73.7%  | 73.7%  | ----- |
| 76  | AY463060.1_SARS_coronavirus_ShanghaiQXC2_complete_genome  | 73.7%  | 73.7%  | ----- |
| 77  | AY485277.1_SARS_coronavirus_Sin01-11_complete_genome      | 100.0% | 100.0% | ----- |
| 78  | AY485278.1_SARS_coronavirus_Sin03-11_complete_genome      | 100.0% | 100.0% | ----- |
| 79  | AY502923.1_SARS_coronavirus_TW10_complete_genome          | 100.0% | 100.0% | ----- |
| 80  | AY502924.1_SARS_coronavirus_TW11_complete_genome          | 100.0% | 100.0% | ----- |
| 81  | AY502925.1_SARS_coronavirus_TW2_complete_genome           | 100.0% | 100.0% | ----- |
| 82  | AY502926.1_SARS_coronavirus_TW3_complete_genome           | 100.0% | 100.0% | ----- |
| 83  | AY502927.1_SARS_coronavirus_TW4_complete_genome           | 100.0% | 100.0% | ----- |
| 84  | AY502928.1_SARS_coronavirus_TW5_complete_genome           | 100.0% | 100.0% | ----- |
| 85  | AY502929.1_SARS_coronavirus_TW6_complete_genome           | 100.0% | 100.0% | ----- |
| 86  | AY502930.1_SARS_coronavirus_TW7_complete_genome           | 100.0% | 100.0% | ----- |
| 87  | AY502931.1_SARS_coronavirus_TW8_complete_genome           | 100.0% | 100.0% | ----- |
| 88  | AY502932.1_SARS_coronavirus_TW9_complete_genome           | 100.0% | 100.0% | ----- |
| 89  | AY508724.1_SARS_coronavirus_NS-1_complete_genome          | 94.7%  | 94.7%  | ----- |
| 90  | AY559081.1_SARS_coronavirus_Sin842_complete_genome        | 95.7%  | 95.3%  | ----- |
| 91  | AY559082.1_SARS_coronavirus_Sin852_complete_genome        | 99.7%  | 96.3%  | ----- |
| 92  | AY559083.1_SARS_coronavirus_Sin408_complete_genome        | 88.7%  | 85.3%  | ----- |
| 93  | AY559084.1_SARS_coronavirus_Sin3765V_complete_genome      | 94.7%  | 94.7%  | ----- |
| 94  | AY559085.1_SARS_coronavirus_Sin848_complete_genome        | 94.7%  | 94.7%  | ----- |
| 95  | AY559086.1_SARS_coronavirus_Sin849_complete_genome        | 94.7%  | 94.7%  | ----- |
| 96  | AY559087.1_SARS_coronavirus_Sin3725V_complete_genome      | 94.7%  | 94.7%  | ----- |
| 97  | AY559088.1_SARS_coronavirus_SinP1_complete_genome         | 94.7%  | 94.7%  | ----- |
| 98  | AY559089.1_SARS_coronavirus_SinP2_complete_genome         | 94.7%  | 94.7%  | ----- |
| 99  | AY559090.1_SARS_coronavirus_SinP3_complete_genome         | 95.3%  | 92.7%  | ----- |
| 100 | AY559091.1_SARS_coronavirus_SinP4_complete_genome         | 94.7%  | 94.7%  | ----- |
| 101 | AY559092.1_SARS_coronavirus_SinP5_complete_genome         | 94.7%  | 94.7%  | ----- |
| 102 | AY559093.1_SARS_coronavirus_Sin845_complete_genome        | 94.7%  | 94.7%  | ----- |
| 103 | AY559094.1_SARS_coronavirus_Sin846_complete_genome        | 94.7%  | 94.7%  | ----- |
| 104 | AY559095.1_SARS_coronavirus_Sin847_complete_genome        | 96.7%  | 96.0%  | ----- |
| 105 | AY559096.1_SARS_coronavirus_Sin850_complete_genome        | 97.3%  | 95.7%  | ----- |
| 106 | AY559097.1_SARS_coronavirus_Sin3408L_complete_genome      | 94.7%  | 94.7%  | ----- |
| 107 | AY594412.1_SARS_coronavirus_LiJ-2004_complete_genome      | 93.0%  | 93.0%  | ----- |
| 108 | AY654624.1_SARS_coronavirus_TJF_complete_genome           | 99.7%  | 99.0%  | ----- |
| 109 | AY714217.1_SARS_Coronavirus_CDC_200301157_complete_genome | 100.0% | 100.0% | ----- |
| 110 | CQ903009.1_Sequence_13_from_Patent_WO2004094667           | 100.0% | 99.7%  | ----- |
| 111 | CQ918584.1_Sequence_1_from_Patent_WO2004096842            | 95.0%  | 95.0%  | ----- |
| 112 | CQ918595.1_Sequence_2_from_Patent_WO2004096842            | 95.0%  | 95.0%  | ----- |
| 113 | CQ918598.1_Sequence_15_from_Patent_WO2004096842           | 100.0% | 100.0% | ----- |
| 114 | NC_004718.3_SARS_coronavirus_complete_genome              | 100.0% | 100.0% | ----- |
|     | consensus/100%                                            |        |        | ----- |
|     | consensus/90%                                             |        |        | ----- |
|     | consensus/80%                                             |        |        | ----- |
|     | consensus/70%                                             |        |        | ----- |

|     |                                                                                               |        |        |       |                          |  |  |       |
|-----|-----------------------------------------------------------------------------------------------|--------|--------|-------|--------------------------|--|--|-------|
|     |                                                                                               | cov    | pid    | 561   |                          |  |  | 584   |
| 1   | AP006557.1_SARS_coronavirus_TWH_genomic_RNA_complete_genome                                   | 100.0% | 100.0% | ----- |                          |  |  | ----- |
| 2   | AP006558.1_SARS_coronavirus_TWJ_genomic_RNA_complete_genome                                   | 100.0% | 100.0% | ----- |                          |  |  | ----- |
| 3   | AP006559.1_SARS_coronavirus_TWK_genomic_RNA_complete_genome                                   | 100.0% | 100.0% | ----- |                          |  |  | ----- |
| 4   | AP006560.1_SARS_coronavirus_TWS_genomic_RNA_complete_genome                                   | 100.0% | 100.0% | ----- |                          |  |  | ----- |
| 5   | AP006561.1_SARS_coronavirus_TWY_genomic_RNA_complete_genome                                   | 100.0% | 100.0% | ----- |                          |  |  | ----- |
| 6   | AY274119.3_Severe_acute_respiratory_syndrome-related_coronavirus_isolate_Tor2_complete_genome | 100.0% | 100.0% | ----- |                          |  |  | ----- |
| 7   | AY278487.1_SARS_coronavirus_B01_complete_genome                                               | 100.0% | 100.0% | ----- |                          |  |  | ----- |
| 8   | AY278488.2_SARS_coronavirus_B01_complete_genome                                               | 93.7%  | 93.7%  | ----- |                          |  |  | ----- |
| 9   | AY278489.2_SARS_coronavirus_GD01_complete_genome                                              | 94.7%  | 94.7%  | ----- |                          |  |  | ----- |
| 10  | AY278490.3_SARS_coronavirus_B03_complete_genome                                               | 98.7%  | 98.7%  | ----- |                          |  |  | ----- |
| 11  | AY278491.2_SARS_coronavirus_HKU-39849_complete_genome                                         | 100.0% | 100.0% | ----- |                          |  |  | ----- |
| 12  | AY27854.1_SARS_coronavirus_CUH-K1_complete_genome                                             | 95.0%  | 95.0%  | ----- |                          |  |  | ----- |
| 13  | AY278741.1_SARS_coronavirus_Urbani_complete_genome                                            | 100.0% | 100.0% | ----- |                          |  |  | ----- |
| 14  | AY279354.2_SARS_coronavirus_B04_complete_genome                                               | 94.7%  | 94.7%  | ----- |                          |  |  | ----- |
| 15  | AY282752.2_SARS_coronavirus_CUH-K-Su10_complete_genome                                        | 95.0%  | 95.0%  | ----- |                          |  |  | ----- |
| 16  | AY283794.1_SARS_coronavirus_Sin2500_complete_genome                                           | 94.7%  | 94.7%  | ----- |                          |  |  | ----- |
| 17  | AY283795.1_SARS_coronavirus_Sin2677_complete_genome                                           | 94.7%  | 94.7%  | ----- |                          |  |  | ----- |
| 18  | AY283796.1_SARS_coronavirus_Sin2679_complete_genome                                           | 94.7%  | 94.7%  | ----- |                          |  |  | ----- |
| 19  | AY283797.1_SARS_coronavirus_Sin2748_complete_genome                                           | 94.7%  | 94.7%  | ----- |                          |  |  | ----- |
| 20  | AY283798.2_SARS_coronavirus_Sin2774_complete_genome                                           | 94.7%  | 94.7%  | ----- |                          |  |  | ----- |
| 21  | AY291315.1_SARS_coronavirus_Frankfurt_1_complete_genome                                       | 100.0% | 100.0% | ----- |                          |  |  | ----- |
| 22  | AY291451.1_SARS_coronavirus_TW1_complete_genome                                               | 100.0% | 100.0% | ----- |                          |  |  | ----- |
| 23  | AY297028.1_SARS_coronavirus_Z01_complete_genome                                               | 95.3%  | 95.3%  | ----- |                          |  |  | ----- |
| 24  | AY304486.1_SARS_coronavirus_S23_complete_genome                                               | 95.0%  | 95.0%  | ----- |                          |  |  | ----- |
| 25  | AY304488.1_SARS_coronavirus_S216_complete_genome                                              | 95.0%  | 95.0%  | ----- |                          |  |  | ----- |
| 26  | AY304495.1_SARS_coronavirus_G250_complete_genome                                              | 95.0%  | 95.0%  | ----- |                          |  |  | ----- |
| 27  | AY310120.1_SARS_coronavirus_FNA_complete_genome                                               | 100.0% | 100.0% | ----- |                          |  |  | ----- |
| 28  | AY313906.1_SARS_coronavirus_GD69_complete_genome                                              | 100.0% | 100.0% | ----- |                          |  |  | ----- |
| 29  | AY321118.1_SARS_coronavirus_TWC_complete_genome                                               | 100.0% | 100.0% | ----- |                          |  |  | ----- |
| 30  | AY323977.2_SARS_coronavirus_HSR_1_complete_genome                                             | 100.0% | 100.0% | ----- |                          |  |  | ----- |
| 31  | AY338174.1_SARS_coronavirus_Taiwan_TC1_complete_genome                                        | 77.0%  | 77.0%  | ----- |                          |  |  | ----- |
| 32  | AY338175.1_SARS_coronavirus_Taiwan_TC2_complete_genome                                        | 77.0%  | 77.0%  | ----- |                          |  |  | ----- |
| 33  | AY345986.1_SARS_coronavirus_CUH-K-AG01_complete_genome                                        | 95.0%  | 95.0%  | ----- |                          |  |  | ----- |
| 34  | AY345987.1_SARS_coronavirus_CUH-K-AG02_complete_genome                                        | 95.0%  | 95.0%  | ----- |                          |  |  | ----- |
| 35  | AY345988.1_SARS_coronavirus_CUH-K-AG03_complete_genome                                        | 95.0%  | 95.0%  | ----- |                          |  |  | ----- |
| 36  | AY348314.1_SARS_coronavirus_Taiwan_TC3_complete_genome                                        | 77.0%  | 77.0%  | ----- |                          |  |  | ----- |
| 37  | AY350750.1_SARS_coronavirus_PUMC01_complete_genome                                            | 95.7%  | 95.7%  | ----- |                          |  |  | ----- |
| 38  | AY351680.1_SARS_coronavirus_ZMY_1_complete_genome                                             | 100.0% | 99.7%  | ----- |                          |  |  | ----- |
| 39  | AY357075.1_SARS_coronavirus_PUMC02_complete_genome                                            | 95.3%  | 95.3%  | ----- |                          |  |  | ----- |
| 40  | AY357076.1_SARS_coronavirus_PUMC03_complete_genome                                            | 95.3%  | 95.3%  | ----- |                          |  |  | ----- |
| 41  | AY362698.1_SARS_coronavirus_TW2_complete_genome                                               | 100.0% | 100.0% | ----- |                          |  |  | ----- |
| 42  | AY362699.1_SARS_coronavirus_TW3_complete_genome                                               | 100.0% | 100.0% | ----- |                          |  |  | ----- |
| 43  | AY390556.1_SARS_coronavirus_G202_complete_genome                                              | 100.0% | 100.0% | ----- |                          |  |  | ----- |
| 44  | AY394850.2_SARS_coronavirus_WUO_complete_genome                                               | 100.0% | 100.0% | ----- |                          |  |  | ----- |
| 45  | AY394977.1_SARS_coronavirus_G2-A_partial_genome                                               | 83.0%  | 83.0%  | ----- |                          |  |  | ----- |
| 46  | AY394978.1_SARS_coronavirus_G2-B_partial_genome                                               | 76.0%  | 76.0%  | ----- |                          |  |  | ----- |
| 47  | AY394979.1_SARS_coronavirus_G2-C_partial_genome                                               | 82.7%  | 82.7%  | ----- |                          |  |  | ----- |
| 48  | AY394980.1_SARS_coronavirus_G2-D_partial_genome                                               | 84.7%  | 84.3%  | ----- |                          |  |  | ----- |
| 49  | AY394981.1_SARS_coronavirus_HGZBL1-A_partial_genome                                           | 83.0%  | 83.0%  | ----- |                          |  |  | ----- |
| 50  | AY394982.1_SARS_coronavirus_HGZBL1-B_partial_genome                                           | 82.7%  | 82.7%  | ----- |                          |  |  | ----- |
| 51  | AY394983.1_SARS_coronavirus_HGZ2-A_complete_genome                                            | 82.7%  | 82.7%  | ----- |                          |  |  | ----- |
| 52  | AY394984.1_SARS_coronavirus_HSZ-A_partial_genome                                              | 84.3%  | 84.3%  | ----- |                          |  |  | ----- |
| 53  | AY394985.1_SARS_coronavirus_HSZ-Bb_partial_genome                                             | 16.7%  | 16.7%  | ----- | TGGTTCGAGAAATGGACGCGATTC |  |  | ----- |
| 54  | AY394986.1_SARS_coronavirus_HSZ-Cb_partial_genome                                             | 83.0%  | 83.0%  | ----- |                          |  |  | ----- |
| 55  | AY394987.1_SARS_coronavirus_HSZ2-Fb_complete_genome                                           | 86.0%  | 86.0%  | ----- |                          |  |  | ----- |
| 56  | AY394988.1_SARS_coronavirus_JMD_partial_genome                                                | 71.3%  | 71.0%  | ----- |                          |  |  | ----- |
| 57  | AY394989.1_SARS_coronavirus_HZS-D_complete_genome                                             | 95.0%  | 95.0%  | ----- |                          |  |  | ----- |
| 58  | AY394990.1_SARS_coronavirus_HZS2-E_complete_genome                                            | 95.0%  | 95.0%  | ----- |                          |  |  | ----- |
| 59  | AY394991.1_SARS_coronavirus_HZS2-Fc_complete_genome                                           | 95.0%  | 95.0%  | ----- |                          |  |  | ----- |
| 60  | AY394992.1_SARS_coronavirus_HZS2-C_complete_genome                                            | 95.0%  | 95.0%  | ----- |                          |  |  | ----- |
| 61  | AY394993.1_SARS_coronavirus_HGZBL2_complete_genome                                            | 95.0%  | 95.0%  | ----- |                          |  |  | ----- |
| 62  | AY394994.1_SARS_coronavirus_HSZ-Bc_complete_genome                                            | 95.0%  | 95.0%  | ----- |                          |  |  | ----- |
| 63  | AY394995.1_SARS_coronavirus_HSZ-Cc_complete_genome                                            | 95.0%  | 95.0%  | ----- |                          |  |  | ----- |
| 64  | AY394996.1_SARS_coronavirus_ZS-B_complete_genome                                              | 95.0%  | 95.0%  | ----- |                          |  |  | ----- |
| 65  | AY394997.1_SARS_coronavirus_ZS-A_complete_genome                                              | 95.0%  | 95.0%  | ----- |                          |  |  | ----- |
| 66  | AY394998.1_SARS_coronavirus_LC1_complete_genome                                               | 95.0%  | 95.0%  | ----- |                          |  |  | ----- |
| 67  | AY394999.1_SARS_coronavirus_LC2_complete_genome                                               | 95.0%  | 95.0%  | ----- |                          |  |  | ----- |
| 68  | AY395000.1_SARS_coronavirus_LC3_complete_genome                                               | 95.0%  | 95.0%  | ----- |                          |  |  | ----- |
| 69  | AY395001.1_SARS_coronavirus_LC4_complete_genome                                               | 95.0%  | 95.0%  | ----- |                          |  |  | ----- |
| 70  | AY395002.1_SARS_coronavirus_LC5_complete_genome                                               | 95.0%  | 95.0%  | ----- |                          |  |  | ----- |
| 71  | AY395003.1_SARS_coronavirus_ZS-C_complete_genome                                              | 83.0%  | 83.0%  | ----- |                          |  |  | ----- |
| 72  | AY395004.1_SARS_coronavirus_HSZ2-Bb_partial_genome                                            | 84.3%  | 84.3%  | ----- |                          |  |  | ----- |
| 73  | AY427439.1_SARS_coronavirus_AS_complete_genome                                                | 94.7%  | 94.7%  | ----- |                          |  |  | ----- |
| 74  | AY461660.1_SARS_coronavirus_SoD_complete_genome                                               | 95.0%  | 94.7%  | ----- |                          |  |  | ----- |
| 75  | AY463059.1_SARS_coronavirus_ShanghaiQXC1_complete_genome                                      | 73.7%  | 73.7%  | ----- |                          |  |  | ----- |
| 76  | AY463060.1_SARS_coronavirus_ShanghaiQXC2_complete_genome                                      | 73.7%  | 73.7%  | ----- |                          |  |  | ----- |
| 77  | AY485277.1_SARS_coronavirus_Sin01-11_complete_genome                                          | 100.0% | 100.0% | ----- |                          |  |  | ----- |
| 78  | AY485278.1_SARS_coronavirus_Sin03-11_complete_genome                                          | 100.0% | 100.0% | ----- |                          |  |  | ----- |
| 79  | AY502923.1_SARS_coronavirus_TW10_complete_genome                                              | 100.0% | 100.0% | ----- |                          |  |  | ----- |
| 80  | AY502924.1_SARS_coronavirus_TW11_complete_genome                                              | 100.0% | 100.0% | ----- |                          |  |  | ----- |
| 81  | AY502925.1_SARS_coronavirus_TW2_complete_genome                                               | 100.0% | 100.0% | ----- |                          |  |  | ----- |
| 82  | AY502926.1_SARS_coronavirus_TW3_complete_genome                                               | 100.0% | 100.0% | ----- |                          |  |  | ----- |
| 83  | AY502927.1_SARS_coronavirus_TW4_complete_genome                                               | 100.0% | 100.0% | ----- |                          |  |  | ----- |
| 84  | AY502928.1_SARS_coronavirus_TW5_complete_genome                                               | 100.0% | 100.0% | ----- |                          |  |  | ----- |
| 85  | AY502929.1_SARS_coronavirus_TW6_complete_genome                                               | 100.0% | 100.0% | ----- |                          |  |  | ----- |
| 86  | AY502930.1_SARS_coronavirus_TW7_complete_genome                                               | 100.0% | 100.0% | ----- |                          |  |  | ----- |
| 87  | AY502931.1_SARS_coronavirus_TW8_complete_genome                                               | 100.0% | 100.0% | ----- |                          |  |  | ----- |
| 88  | AY502932.1_SARS_coronavirus_TW9_complete_genome                                               | 100.0% | 100.0% | ----- |                          |  |  | ----- |
| 89  | AY508724.1_SARS_coronavirus_NS-1_complete_genome                                              | 94.7%  | 94.7%  | ----- |                          |  |  | ----- |
| 90  | AY559081.1_SARS_coronavirus_Sin842_complete_genome                                            | 95.7%  | 95.3%  | ----- |                          |  |  | ----- |
| 91  | AY559082.1_SARS_coronavirus_Sin852_complete_genome                                            | 99.7%  | 96.3%  | ----- |                          |  |  | ----- |
| 92  | AY559083.1_SARS_coronavirus_Sin408_complete_genome                                            | 88.7%  | 85.3%  | ----- |                          |  |  | ----- |
| 93  | AY559084.1_SARS_coronavirus_Sin3765V_complete_genome                                          | 94.7%  | 94.7%  | ----- |                          |  |  | ----- |
| 94  | AY559085.1_SARS_coronavirus_Sin848_complete_genome                                            | 94.7%  | 94.7%  | ----- |                          |  |  | ----- |
| 95  | AY559086.1_SARS_coronavirus_Sin849_complete_genome                                            | 94.7%  | 94.7%  | ----- |                          |  |  | ----- |
| 96  | AY559087.1_SARS_coronavirus_Sin3725V_complete_genome                                          | 94.7%  | 94.7%  | ----- |                          |  |  | ----- |
| 97  | AY559088.1_SARS_coronavirus_SinP1_complete_genome                                             | 94.7%  | 94.7%  | ----- |                          |  |  | ----- |
| 98  | AY559089.1_SARS_coronavirus_SinP2_complete_genome                                             | 94.7%  | 94.7%  | ----- |                          |  |  | ----- |
| 99  | AY559090.1_SARS_coronavirus_SinP3_complete_genome                                             | 95.3%  | 92.7%  | ----- |                          |  |  | ----- |
| 100 | AY559091.1_SARS_coronavirus_SinP4_complete_genome                                             | 94.7%  | 94.7%  | ----- |                          |  |  | ----- |
| 101 | AY559092.1_SARS_coronavirus_SinP5_complete_genome                                             | 94.7%  | 94.7%  | ----- |                          |  |  | ----- |
| 102 | AY559093.1_SARS_coronavirus_Sin845_complete_genome                                            | 94.7%  | 94.7%  | ----- |                          |  |  | ----- |
| 103 | AY559094.1_SARS_coronavirus_Sin846_complete_genome                                            | 94.7%  | 94.7%  | ----- |                          |  |  | ----- |
| 104 | AY559095.1_SARS_coronavirus_Sin847_complete_genome                                            | 96.7%  | 96.0%  | ----- |                          |  |  | ----- |
| 105 | AY559096.1_SARS_coronavirus_Sin850_complete_genome                                            | 97.3%  | 95.7%  | ----- |                          |  |  | ----- |
| 106 | AY559097.1_SARS_coronavirus_Sin3408L_complete_genome                                          | 94.7%  | 94.7%  | ----- |                          |  |  | ----- |
| 107 | AY594412.1_SARS_coronavirus_LiJ-2004_complete_genome                                          | 93.0%  | 93.0%  | ----- |                          |  |  | ----- |

|     |                                                           |        |        |       |
|-----|-----------------------------------------------------------|--------|--------|-------|
| 108 | AY654624.1_SARS_coronavirus_TJF_complete_genome           | 99.7%  | 99.0%  | ----- |
| 109 | AY714217.1_SARS_Coronavirus_CDC*200301157_complete_genome | 100.0% | 100.0% | ----- |
| 110 | CQ903009.1_Sequence_13_from_Patent_WO2004094667           | 100.0% | 99.7%  | ----- |
| 111 | CQ918584.1_Sequence_1_from_Patent_WO2004096842            | 95.0%  | 95.0%  | ----- |
| 112 | CQ918585.1_Sequence_2_from_Patent_WO2004096842            | 95.0%  | 95.0%  | ----- |
| 113 | CQ918598.1_Sequence_15_from_Patent_WO2004096842           | 100.0% | 100.0% | ----- |
| 114 | NC_004718.3_SARS_coronavirus_complete_genome              | 100.0% | 100.0% | ----- |
|     | consensus/100%                                            |        |        | ..... |
|     | consensus/90%                                             |        |        | ..... |
|     | consensus/80%                                             |        |        | ..... |
|     | consensus/70%                                             |        |        | ..... |

[MView 1.63](#), Copyright © 1997-2018 [Nigel P. Brown](#)
