# Supplementary material for: Potential use of noncoding RNAs and innovative therapeutic strategies to target the 5’UTR of SARS-CoV-2
Source: PubMed Central journal article supplement (PMC7466951; doi:10.2217/epi-2020-0162), 2020-09-02
Supplement: epi-2020-0162-supp-table-2.pdf [file epi-2020-0162-supp-table-2.pdf]

Reference sequence (1): hCoV-19/Algeria/G0638\_2264/2020|EPI\_ISL\_418241|2020-03-02
Identities normalised by aligned length.
Colored by: identity

Table with columns: cov, pid, and sequence alignment. Rows list various countries and dates, such as hCoV-19/Algeria/G0638\_2264/2020, hCoV-19/Australia/NSW01/2020, etc.

consensus/100%
consensus/90%
consensus/80%
consensus/70%

Table with columns: cov, pid, and sequence alignment. This section shows the alignment for the 70% consensus level, with the same country and date entries as the first table.

Table with columns: 1, and sequence alignment. This section shows the alignment for the 100% consensus level, with the same country and date entries as the first table.

consensus/100%
consensus/90%
consensus/80%
consensus/70%

Table with columns: 1, and sequence alignment. This section shows the alignment for the 100% consensus level, with the same country and date entries as the first table.

|    |                                              |                |            |       |       |
|----|----------------------------------------------|----------------|------------|-------|-------|
| 46 | hCoV-19/NanChang/JX216/2020                  | EPI_ISL_417420 | 2020-03-23 | 91.7% | 90.2% |
| 47 | hCoV-19/Nepal/61/2020                        | EPI_ISL_414301 | 2020-01-13 | 90.1% | 86.1% |
| 48 | hCoV-19/Netherlands/Utrecht/1/2020           | EPI_ISL_414435 | 2020-03-03 | 96.3% | 97.5% |
| 49 | hCoV-19/New_Zealand/01/2020                  | EPI_ISL_413490 | 2020-02-27 | 97.9% | 95.9% |
| 50 | hCoV-19/Nonthaburi/61/2020                   | EPI_ISL_403962 | 2020-01-08 | 86.4% | 84.2% |
| 51 | hCoV-19/Norway/1379/2020                     | EPI_ISL_417483 | 2020-02-27 | 85.5% | 82.7% |
| 52 | hCoV-19/Pakistan/Gilgit1/2020                | EPI_ISL_417444 | 2020-03-04 | 95.5% | 94.7% |
| 53 | hCoV-19/Panama/328677/2020                   | EPI_ISL_415152 | 2020-03-06 | 81.8% | 79.8% |
| 54 | hCoV-19/pangolin/Guangdong/1/2019            | EPI_ISL_410721 | 2019       | 81.4% | 78.9% |
| 55 | hCoV-19/Peru/010/2020                        | EPI_ISL_415787 | 2020-03-10 | 87.6% | 84.1% |
| 56 | hCoV-19/Poland/PL_P1/2020                    | EPI_ISL_416488 | 2020-03-03 | 82.2% | 79.4% |
| 57 | hCoV-19/Portugal/CV62/2020                   | EPI_ISL_413647 | 2020-03-01 | 81.8% | 80.2% |
| 58 | hCoV-19/Russia/StPetersburg-3524/2020        | EPI_ISL_415710 | 2020-03-15 | 77.3% | 79.2% |
| 59 | hCoV-19/Saudi_Arabia/KAIMRC-Alghoribi/1/2020 | EPI_ISL_416432 | 2020-03-07 | 72.7% | 76.2% |
| 60 | hCoV-19/Scotland/CVR05/2020                  | EPI_ISL_414027 | 2020-03-04 | 97.9% | 96.3% |
| 61 | hCoV-19/Senegal/003/2020                     | EPI_ISL_418206 | 2020-02-28 | 96.7% | 95.5% |
| 62 | hCoV-19/Shandong/IVDC-SD-001/2020            | EPI_ISL_408482 | 2020-01-19 | 83.9% | 84.2% |
| 63 | hCoV-19/Shanghai/SH0002/2020                 | EPI_ISL_416316 | 2020-01-25 | 93.4% | 91.8% |
| 64 | hCoV-19/Shenzhen/HKU-SZ-002/2020             | EPI_ISL_406030 | 2020-01-10 | 92.6% | 92.5% |
| 65 | hCoV-19/Sichuan/IVDC-SC-001/2020             | EPI_ISL_408484 | 2020-01-15 | 85.5% | 85.5% |
| 66 | hCoV-19/Singapore/1/2020                     | EPI_ISL_406973 | 2020-01-23 | 82.6% | 79.9% |
| 67 | hCoV-19/Slovakia/SK-BMCL1/2020               | EPI_ISL_417877 | 2020-03-06 | 81.4% | 80.7% |
| 68 | hCoV-19/South_Africa/R03006-20/2020          | EPI_ISL_417186 | 2020-03-07 | 78.1% | 79.4% |
| 69 | hCoV-19/South_Korea/KCDC03/2020              | EPI_ISL_407193 | 2020-01-25 | 91.3% | 90.9% |
| 70 | hCoV-19/Spain/Madrid_H10_39/2020             | EPI_ISL_417963 | 2020-03-12 | 95.9% | 96.3% |
| 71 | hCoV-19/Sweden/01/2020                       | EPI_ISL_411951 | 2020-02-07 | 83.5% | 80.1% |
| 72 | hCoV-19/Switzerland/100047377/2020           | EPI_ISL_413020 | 2020-02-27 | 78.1% | 79.4% |
| 73 | hCoV-19/Taiwan/2/2020                        | EPI_ISL_406031 | 2020-01-23 | 85.1% | 81.3% |
| 74 | hCoV-19/USA/A21/2020                         | EPI_ISL_406223 | 2020-01-22 | 84.3% | 80.2% |
| 75 | hCoV-19/Vietnam/19-018/2020                  | EPI_ISL_418269 | 2020-01-22 | 81.4% | 79.7% |
| 76 | hCoV-19/Wales/PHW04/2020                     | EPI_ISL_415041 | 2020-03-07 | 97.9% | 95.2% |
| 77 | hCoV-19/Yunnan/HBCDC-HB-01/2019              | EPI_ISL_402132 | 2019-12-30 | 84.7% | 84.0% |
| 78 | hCoV-19/Yunnan/Hu-1/2019                     | EPI_ISL_402125 | 2019-12-31 | 83.1% | 80.2% |
| 79 | hCoV-19/Yunnan/IVDC-YN-003/2020              | EPI_ISL_408480 | 2020-01-17 | 82.2% | 81.8% |
| 80 | hCoV-19/Zhejiang/WZ-01/2020                  | EPI_ISL_404227 | 2020-01-16 | 89.3% | 87.4% |

consensus/100%

consensus/90%

consensus/80%

consensus/70%

| id | cov                                          | pid            | 161        |        |        |
|----|----------------------------------------------|----------------|------------|--------|--------|
| 1  | hCoV-19/Algeria/G0638_2264/2020              | EPI_ISL_418241 | 2020-03-02 | 100.0% | 100.0% |
| 2  | hCoV-19/Australia/NSW01/2020                 | EPI_ISL_407893 | 2020-01-24 | 97.9%  | 96.3%  |
| 3  | hCoV-19/bat/Yunnan/RaTG13/2013               | EPI_ISL_402131 | 2013-07-24 | 86.4%  | 84.4%  |
| 4  | hCoV-19/Beijing/105/2020                     | EPI_ISL_413518 | 2020-01-26 | 82.6%  | 79.9%  |
| 5  | hCoV-19/Belgium/BA-02291/2020                | EPI_ISL_415159 | 2020-02-09 | 90.9%  | 90.2%  |
| 6  | hCoV-19/Brazil/AMBR-02/2020                  | EPI_ISL_417034 | 2020-03-16 | 100.0% | 98.0%  |
| 7  | hCoV-19/Cambodia/0012/2020                   | EPI_ISL_411902 | 2020-01-27 | 82.2%  | 80.2%  |
| 8  | hCoV-19/Canada/BC_02421/2020                 | EPI_ISL_415581 | 2020-03-01 | 97.9%  | 96.3%  |
| 9  | hCoV-19/Chile/Santiago_op2d1/2020            | EPI_ISL_415658 | 2020-03-06 | 97.5%  | 97.9%  |
| 10 | hCoV-19/China/IQT001/2020                    | EPI_ISL_412966 | 2020-02-05 | 81.0%  | 78.6%  |
| 11 | hCoV-19/China/WHU02/2020                     | EPI_ISL_406717 | 2020-01-02 | 83.1%  | 80.3%  |
| 12 | hCoV-19/Chongqing/IVDC-CQ-001/2020           | EPI_ISL_408481 | 2020-01-18 | 81.4%  | 82.0%  |
| 13 | hCoV-19/Congo/108/2020                       | EPI_ISL_417948 | 2020-03-19 | 85.1%  | 82.1%  |
| 14 | hCoV-19/Denmark/SSI-01/2020                  | EPI_ISL_416142 | 2020-02-26 | 91.7%  | 90.2%  |
| 15 | hCoV-19/England/01/2020                      | EPI_ISL_407071 | 2020-01-29 | 85.1%  | 82.0%  |
| 16 | hCoV-19/Finland/1/2020                       | EPI_ISL_407079 | 2020-01-29 | 88.4%  | 84.9%  |
| 17 | hCoV-19/Hong_Kong/Casae1_2101/2020           | EPI_ISL_406534 | 2020-01-22 | 90.9%  | 89.0%  |
| 18 | hCoV-19/France/ARA094100/2020                | EPI_ISL_418412 | 2020-03-15 | 85.5%  | 84.8%  |
| 19 | hCoV-19/Fujian/13/2020                       | EPI_ISL_411066 | 2020-01-22 | 83.5%  | 80.1%  |
| 20 | hCoV-19/Georgia/Tb/2020                      | EPI_ISL_416482 | 2020-03-13 | 84.3%  | 81.6%  |
| 21 | hCoV-19/Germany/Baden-Wuerttemberg-1/2020    | EPI_ISL_412912 | 2020-02-25 | 95.0%  | 99.1%  |
| 22 | hCoV-19/Germany/BavPat1/2020                 | EPI_ISL_406862 | 2020-01-28 | 97.9%  | 96.7%  |
| 23 | hCoV-19/Germany/NRW-01/2020                  | EPI_ISL_413488 | 2020-02-28 | 97.9%  | 95.9%  |
| 24 | hCoV-19/Greece/10/2020                       | EPI_ISL_418263 | 2020-03-18 | 83.5%  | 80.5%  |
| 25 | hCoV-19/Guangdong/2020XN4243-P0035/2020      | EPI_ISL_413853 | 2020-01-30 | 85.5%  | 88.0%  |
| 26 | hCoV-19/Guangzhou/20SPF206/2020              | EPI_ISL_406533 | 2020-01-22 | 89.7%  | 89.0%  |
| 27 | hCoV-19/Hangzhou/HZ-1/2020                   | EPI_ISL_406970 | 2020-01-20 | 83.1%  | 81.0%  |
| 28 | hCoV-19/Hefei/2/2020                         | EPI_ISL_412026 | 2020-02-23 | 84.3%  | 80.2%  |
| 29 | hCoV-19/Hong_Kong/Casae1_2101/2020           | EPI_ISL_417176 | 2020-01-21 | 97.5%  | 95.6%  |
| 30 | hCoV-19/Hungary/1/2020                       | EPI_ISL_418183 | 2020-03-17 | 97.9%  | 94.4%  |
| 31 | hCoV-19/Iceland/1/2020                       | EPI_ISL_417535 | 2020-03-13 | 87.2%  | 84.1%  |
| 32 | hCoV-19/India/1-31/2020                      | EPI_ISL_413523 | 2020-01-31 | 91.3%  | 88.0%  |
| 33 | hCoV-19/Ireland/21023/2020                   | EPI_ISL_418516 | 2020-03-06 | 81.8%  | 78.1%  |
| 34 | hCoV-19/Israel/ISR_T0320/2020                | EPI_ISL_419210 | 2020-03-03 | 79.8%  | 78.5%  |
| 35 | hCoV-19/Italy/SPL1/2020                      | EPI_ISL_412974 | 2020-01-29 | 83.1%  | 80.0%  |
| 36 | hCoV-19/Japan/DP0005/2020                    | EPI_ISL_416565 | 2020-02-15 | 88.4%  | 85.9%  |
| 37 | hCoV-19/Jiangsu/JS01/2020                    | EPI_ISL_411950 | 2020-01-23 | 82.2%  | 79.8%  |
| 38 | hCoV-19/Jiangsu/JS02/2020                    | EPI_ISL_411952 | 2020-01-24 | 82.2%  | 79.8%  |
| 39 | hCoV-19/Jiangxi/IVDC-JX-002/2020             | EPI_ISL_408486 | 2020-01-11 | 85.5%  | 85.5%  |
| 40 | hCoV-19/Jingzhou/HBCDC-HB-01/2020            | EPI_ISL_412459 | 2020-01-08 | 83.5%  | 83.8%  |
| 41 | hCoV-19/Korea/Hu-1/2020                      | EPI_ISL_416541 | 2020-01-02 | 83.1%  | 80.3%  |
| 42 | hCoV-19/Lithuania/CHV11632/2020              | EPI_ISL_416741 | 2020-02-02 | 85.1%  | 84.4%  |
| 43 | hCoV-19/Luxembourg/LNS0158952/2020           | EPI_ISL_417534 | 2020-03-18 | 78.5%  | 79.9%  |
| 44 | hCoV-19/Malaysia/188407/2020                 | EPI_ISL_417918 | 2020-03-18 | 95.5%  | 93.9%  |
| 45 | hCoV-19/Mexico/CDMX-INDRE_01/2020            | EPI_ISL_412972 | 2020-02-27 | 78.9%  | 79.6%  |
| 46 | hCoV-19/NanChang/JX216/2020                  | EPI_ISL_417420 | 2020-03-23 | 91.7%  | 90.2%  |
| 47 | hCoV-19/Nepal/61/2020                        | EPI_ISL_414301 | 2020-01-13 | 90.1%  | 86.1%  |
| 48 | hCoV-19/Netherlands/Utrecht/1/2020           | EPI_ISL_414435 | 2020-03-03 | 96.3%  | 97.5%  |
| 49 | hCoV-19/New_Zealand/01/2020                  | EPI_ISL_413490 | 2020-02-27 | 97.9%  | 95.9%  |
| 50 | hCoV-19/Nonthaburi/61/2020                   | EPI_ISL_403962 | 2020-01-08 | 86.4%  | 84.2%  |
| 51 | hCoV-19/Norway/1379/2020                     | EPI_ISL_417483 | 2020-02-27 | 85.5%  | 82.7%  |
| 52 | hCoV-19/Pakistan/Gilgit1/2020                | EPI_ISL_417444 | 2020-03-04 | 95.5%  | 94.7%  |
| 53 | hCoV-19/Panama/328677/2020                   | EPI_ISL_415152 | 2020-03-06 | 81.8%  | 79.8%  |
| 54 | hCoV-19/pangolin/Guangdong/1/2019            | EPI_ISL_410721 | 2019       | 81.4%  | 78.9%  |
| 55 | hCoV-19/Peru/010/2020                        | EPI_ISL_415787 | 2020-03-10 | 87.6%  | 84.1%  |
| 56 | hCoV-19/Poland/PL_P1/2020                    | EPI_ISL_416488 | 2020-03-03 | 82.2%  | 79.4%  |
| 57 | hCoV-19/Portugal/CV62/2020                   | EPI_ISL_413647 | 2020-03-01 | 81.8%  | 80.2%  |
| 58 | hCoV-19/Russia/StPetersburg-3524/2020        | EPI_ISL_415710 | 2020-03-15 | 77.3%  | 79.2%  |
| 59 | hCoV-19/Saudi_Arabia/KAIMRC-Alghoribi/1/2020 | EPI_ISL_416432 | 2020-03-07 | 72.7%  | 76.2%  |
| 60 | hCoV-19/Scotland/CVR05/2020                  | EPI_ISL_414027 | 2020-03-04 | 97.9%  | 96.3%  |
| 61 | hCoV-19/Senegal/003/2020                     | EPI_ISL_418206 | 2020-02-28 | 96.7%  | 95.5%  |
| 62 | hCoV-19/Shandong/IVDC-SD-001/2020            | EPI_ISL_408482 | 2020-01-19 | 83.9%  | 84.2%  |
| 63 | hCoV-19/Shanghai/SH0002/2020                 | EPI_ISL_416316 | 2020-01-25 | 93.4%  | 91.8%  |
| 64 | hCoV-19/Shenzhen/HKU-SZ-002/2020             | EPI_ISL_406030 | 2020-01-10 | 92.6%  | 92.5%  |
| 65 | hCoV-19/Sichuan/IVDC-SC-001/2020             | EPI_ISL_408484 | 2020-01-15 | 85.5%  | 85.5%  |
| 66 | hCoV-19/Singapore/1/2020                     | EPI_ISL_406973 | 2020-01-23 | 82.6%  | 79.9%  |
| 67 | hCoV-19/Slovakia/SK-BMCL1/2020               | EPI_ISL_417877 | 2020-03-06 | 81.4%  | 80.7%  |
| 68 | hCoV-19/South_Africa/R03006-20/2020          | EPI_ISL_417186 | 2020-03-07 | 78.1%  | 79.4%  |
| 69 | hCoV-19/South_Korea/KCDC03/2020              | EPI_ISL_407193 | 2020-01-25 | 91.3%  | 90.9%  |
| 70 | hCoV-19/Spain/Madrid_H10_39/2020             | EPI_ISL_417963 | 2020-03-12 | 95.9%  | 96.3%  |
| 71 | hCoV-19/Sweden/01/2020                       | EPI_ISL_411951 | 2020-02-07 | 83.5%  | 80.1%  |
| 72 | hCoV-19/Switzerland/100047377/2020           | EPI_ISL_413020 | 2020-02-27 | 78.1%  | 79.4%  |
| 73 | hCoV-19/Taiwan/2/2020                        | EPI_ISL_406031 | 2020-01-23 | 85.1%  | 81.3%  |
| 74 | hCoV-19/USA/A21/2020                         | EPI_ISL_406223 | 2020-01-22 | 84.3%  | 80.2%  |
| 75 | hCoV-19/Vietnam/19-018/2020                  | EPI_ISL_418269 | 2020-01-22 | 81.4%  | 79.7%  |
| 76 | hCoV-19/Wales/PHW04/2020                     | EPI_ISL_415041 | 2020-03-07 | 97.9%  | 95.2%  |
| 77 | hCoV-19/Yunnan/HBCDC-HB-01/2019              | EPI_ISL_402132 | 2019-12-30 | 84.7%  | 84.0%  |
| 78 | hCoV-19/Yunnan/Hu-1/2019                     | EPI_ISL_402125 | 2019-12-31 | 83.1%  | 80.2%  |
| 79 | hCoV-19/Yunnan/IVDC-YN-003/2020              | EPI_ISL_408480 | 2020-01-17 | 82.2%  | 81.8%  |
| 80 | hCoV-19/Zhejiang/WZ-01/2020                  | EPI_ISL_404227 | 2020-01-16 | 89.3%  | 87.4%  |

consensus/100%

consensus/90%

consensus/80%

consensus/70%

| id | cov                               | pid            | 241        |        |        |
|----|-----------------------------------|----------------|------------|--------|--------|
| 1  | hCoV-19/Algeria/G0638_2264/2020   | EPI_ISL_418241 | 2020-03-02 | 100.0% | 100.0% |
| 2  | hCoV-19/Australia/NSW01/2020      | EPI_ISL_407893 | 2020-01-24 | 97.9%  | 96.3%  |
| 3  | hCoV-19/bat/Yunnan/RaTG13/2013    | EPI_ISL_402131 | 2013-07-24 | 86.4%  | 84.4%  |
| 4  | hCoV-19/Beijing/105/2020          | EPI_ISL_413518 | 2020-01-26 | 82.6%  | 79.9%  |
| 5  | hCoV-19/Belgium/BA-02291/2020     | EPI_ISL_415159 | 2020-02-09 | 90.9%  | 90.2%  |
| 6  | hCoV-19/Brazil/AMBR-02/2020       | EPI_ISL_417034 | 2020-03-16 | 100.0% | 98.0%  |
| 7  | hCoV-19/Cambodia/0012/2020        | EPI_ISL_411902 | 2020-01-27 | 82.2%  | 80.2%  |
| 8  | hCoV-19/Canada/BC_02421/2020      | EPI_ISL_415581 | 2020-03-01 | 97.9%  | 96.3%  |
| 9  | hCoV-19/Chile/Santiago_op2d1/2020 | EPI_ISL_415658 | 2020-03-06 | 97.5%  | 97.9%  |
| 10 | hCoV-19/China/IQT001/2020         | EPI_ISL_412966 | 2020-02-05 | 81.0%  | 78.6%  |
| 11 | hCoV-19/China/WHU02/2020          | EPI_ISL_406717 | 2020-01-02 | 83.1%  | 80.3%  |

|    |                                                                                  |
|----|----------------------------------------------------------------------------------|
| 1  | AACCTTTAAAATCGTGTGGCTGCACCTGGCTGCATGCTTAGTGACCTCAGCAGTATAATTAACAACTAATTACTGTGCTG |
| 2  | AACCTTTAAAATCGTGTGGCTGCACCTGGCTGCATGCTTAGTGACCTCAGCAGTATAATTAACAACTAATTACTGTGCTG |
| 3  | AACCTTTAAAATCGTGTGGCTGCACCTGGCTGCATGCTTAGTGACCTCAGCAGTATAATTAACAACTAATTACTGTGCTG |
| 4  | AACCTTTAAAATCGTGTGGCTGCACCTGGCTGCATGCTTAGTGACCTCAGCAGTATAATTAACAACTAATTACTGTGCTG |
| 5  | AACCTTTAAAATCGTGTGGCTGCACCTGGCTGCATGCTTAGTGACCTCAGCAGTATAATTAACAACTAATTACTGTGCTG |
| 6  | AACCTTTAAAATCGTGTGGCTGCACCTGGCTGCATGCTTAGTGACCTCAGCAGTATAATTAACAACTAATTACTGTGCTG |
| 7  | AACCTTTAAAATCGTGTGGCTGCACCTGGCTGCATGCTTAGTGACCTCAGCAGTATAATTAACAACTAATTACTGTGCTG |
| 8  | AACCTTTAAAATCGTGTGGCTGCACCTGGCTGCATGCTTAGTGACCTCAGCAGTATAATTAACAACTAATTACTGTGCTG |
| 9  | AACCTTTAAAATCGTGTGGCTGCACCTGGCTGCATGCTTAGTGACCTCAGCAGTATAATTAACAACTAATTACTGTGCTG |
| 10 | AACCTTTAAAATCGTGTGGCTGCACCTGGCTGCATGCTTAGTGACCTCAGCAGTATAATTAACAACTAATTACTGTGCTG |
| 11 | AACCTTTAAAATCGTGTGGCTGCACCTGGCTGCATGCTTAGTGACCTCAGCAGTATAATTAACAACTAATTACTGTGCTG |
| 12 | AACCTTTAAAATCGTGTGGCTGCACCTGGCTGCATGCTTAGTGACCTCAGCAGTATAATTAACAACTAATTACTGTGCTG |
| 13 | AACCTTTAAAATCGTGTGGCTGCACCTGGCTGCATGCTTAGTGACCTCAGCAGTATAATTAACAACTAATTACTGTGCTG |
| 14 | AACCTTTAAAATCGTGTGGCTGCACCTGGCTGCATGCTTAGTGACCTCAGCAGTATAATTAACAACTAATTACTGTGCTG |
| 15 | AACCTTTAAAATCGTGTGGCTGCACCTGGCTGCATGCTTAGTGACCTCAGCAGTATAATTAACAACTAATTACTGTGCTG |
| 16 | AACCTTTAAAATCGTGTGGCTGCACCTGGCTGCATGCTTAGTGACCTCAGCAGTATAATTAACAACTAATTACTGTGCTG |
| 17 | AACCTTTAAAATCGTGTGGCTGCACCTGGCTGCATGCTTAGTGACCTCAGCAGTATAATTAACAACTAATTACTGTGCTG |
| 18 | AACCTTTAAAATCGTGTGGCTGCACCTGGCTGCATGCTTAGTGACCTCAGCAGTATAATTAACAACTAATTACTGTGCTG |
| 19 | AACCTTTAAAATCGTGTGGCTGCACCTGGCTGCATGCTTAGTGACCTCAGCAGTATAATTAACAACTAATTACTGTGCTG |
| 20 | AACCTTTAAAATCGTGTGGCTGCACCTGGCTGCATGCTTAGTGACCTCAGCAGTATAATTAACAACTAATTACTGTGCTG |
| 21 | AACCTTTAAAATCGTGTGGCTGCACCTGGCTGCATGCTTAGTGACCTCAGCAGTATAATTA                    |

|               |                                            |                |  |            |       |       |                  |                                                                    |
|---------------|--------------------------------------------|----------------|--|------------|-------|-------|------------------|--------------------------------------------------------------------|
| 12            | hCoV-19/Chongqing/IVDC-CQ-001/2020         | EPI_ISL_408481 |  | 2020-01-18 | 81.4% | 82.0% | CTAGGTTTCGTCGGG  | -----                                                              |
| 13            | hCoV-19/Congo/108/2020                     | EPI_ISL_417948 |  | 2020-03-19 | 85.1% | 82.1% | CTAGGTTTTCGTCGGG | GTGACC-----                                                        |
| 14            | hCoV-19/Denmark/SSI-01/2020                | EPI_ISL_416142 |  | 2020-02-26 | 91.7% | 90.2% | CTAGGTTTTCGTCGGG | GTGACGAAAGGTAAGTGGAG-----                                          |
| 15            | hCoV-19/England/01/2020                    | EPI_ISL_407071 |  | 2020-01-29 | 85.1% | 82.0% | CTAGGTTTTCGTCGGG | GTGACC-----                                                        |
| 16            | hCoV-19/Finland/1/2020                     | EPI_ISL_407079 |  | 2020-01-29 | 88.4% | 84.9% | CTAGGTTTCGTCGGG  | GTGACGAAAGGTA-----                                                 |
| 17            | hCoV-19/Foshan/20SF207/2020                | EPI_ISL_406534 |  | 2020-01-22 | 90.9% | 89.0% | CTAGGTTTCGTCGGG  | GTGACGAAAGGTAAGATGG-----                                           |
| 18            | hCoV-19/France/ARA094100/2020              | EPI_ISL_418412 |  | 2020-03-15 | 85.5% | 84.8% | CTAGGTTTTCGTCGGG | GTGACCG-----                                                       |
| 19            | hCoV-19/Fujian/13/2020                     | EPI_ISL_411066 |  | 2020-01-22 | 83.5% | 80.1% | CTAGGTTTCGTCGGG  | GTGACC-----                                                        |
| 20            | hCoV-19/Gaetgia/Tb/2020                    | EPI_ISL_416482 |  | 2020-03-13 | 84.3% | 81.6% | CTAGGTTTTCGTCGGG | GTGTA-----                                                         |
| 21            | hCoV-19/Germany/Baden-Wuerttemberg-1/2020  | EPI_ISL_412912 |  | 2020-02-25 | 95.0% | 99.1% | CTAGGTTTTCGTCGGG | GTGACGAAAGGTAAGATGGAGACCTTGT-----                                  |
| 22            | hCoV-19/Germany/BavPat1/2020               | EPI_ISL_406862 |  | 2020-01-28 | 97.9% | 96.7% | CTAGGTTTTCGTCGGG | GTGACGAAAGGTAAGATGGAGACCTTGTCCCTGGTTTCAACGAGAAAA-----              |
| 23            | hCoV-19/Germany/NRW-01/2020                | EPI_ISL_413488 |  | 2020-02-28 | 97.9% | 95.9% | CTAGGTTTTCGTCGGG | GTGACGAAAGGTAAGATGGAGACCTTGTCCCTGGTTTCAACGAGAAAAAC-----            |
| 24            | hCoV-19/Greece/10/2020                     | EPI_ISL_418263 |  | 2020-03-18 | 83.5% | 80.5% | CTAGGTTTTCGTCGGG | GTG-----                                                           |
| 25            | hCoV-19/Guangdong/2020XN4243-P0035/2020    | EPI_ISL_413853 |  | 2020-01-30 | 85.5% | 88.0% | CTAGGTTTTCGTCGGG | GTGACCG-----                                                       |
| 26            | hCoV-19/Guangzhou/20SF206/2020             | EPI_ISL_406533 |  | 2020-01-22 | 89.7% | 88.9% | CTAGGTTTTCGTCGGG | GTGACGAAAGGTAAGA-----                                              |
| 27            | hCoV-19/Hangzhou/HZ-1/2020                 | EPI_ISL_406970 |  | 2020-01-20 | 83.1% | 81.0% | CTAGGTTTTCGTCGGG | GTG-----                                                           |
| 28            | hCoV-19/Hefei/2/2020                       | EPI_ISL_412026 |  | 2020-02-23 | 84.3% | 80.2% | CTAGGTTTTCGTCGGG | GTGTA-----                                                         |
| 29            | hCoV-19/Hong_Kong/Casel_21012020/2020      | EPI_ISL_417176 |  | 2020-01-21 | 97.5% | 99.6% | CTAGGTTTTCGTCGGG | GTGACGAAAGGTAAGATGGAGACCTTGTCCCTGGTTTCA-----                       |
| 30            | hCoV-19/Hungary/2/2020                     | EPI_ISL_418183 |  | 2020-03-17 | 97.9% | 94.4% | CTAGGTTTTCGTCGGG | GTGACGAAAGGTAAGATGGAGACCTTGTCCCTGGTTTCAACGAGAAAAACACACCG-----      |
| 31            | hCoV-19/Iceland/1/2020                     | EPI_ISL_417535 |  | 2020-03-13 | 87.2% | 84.1% | CTAGGTTTTCGTCGGG | GTGACGAAAG-----                                                    |
| 32            | hCoV-19/India/1-31/2020                    | EPI_ISL_413523 |  | 2020-01-31 | 91.3% | 88.0% | CTAGGTTTTCGTCGGG | GTGACGAAAG-----                                                    |
| 33            | hCoV-19/Ireland/21023/2020                 | EPI_ISL_418516 |  | 2020-03-06 | 81.8% | 78.1% | CTAGGTTTTCGTCGGG | GTGAAAGTGA-----                                                    |
| 34            | hCoV-19/Israel/ISR_IT0320/2020             | EPI_ISL_419210 |  | 2020-03-03 | 79.8% | 78.5% | CTAGGTTTTCGTCGGG | -----                                                              |
| 35            | hCoV-19/Italy/SPL1/2020                    | EPI_ISL_412974 |  | 2020-01-29 | 83.1% | 80.0% | CTAGGTTTTCGTCGGG | GTG-----                                                           |
| 36            | hCoV-19/Japan/DP0005/2020                  | EPI_ISL_416565 |  | 2020-02-15 | 88.4% | 85.9% | CTAGGTTTTCGTCGGG | GTGACGAAAGGTAAGATGGAGACCTTGTCCCTGGTTTCAACGAGAAAAACACCTCCAACCT----- |
| 37            | hCoV-19/Jiangsu/JS01/2020                  | EPI_ISL_411950 |  | 2020-01-23 | 82.2% | 79.8% | CTAGGTTTTCGTCGGG | -----                                                              |
| 38            | hCoV-19/Jiangsu/JS02/2020                  | EPI_ISL_411952 |  | 2020-01-24 | 82.2% | 79.8% | CTAGGTTTTCGTCGGG | -----                                                              |
| 39            | hCoV-19/Jiangxi/IVDC-JX-002/2020           | EPI_ISL_408486 |  | 2020-01-11 | 85.5% | 85.5% | CTAGGTTTTCGTCGGG | GTGACCG-----                                                       |
| 40            | hCoV-19/Jingzhou/HBCDC-HB-01/2020          | EPI_ISL_412459 |  | 2020-01-08 | 83.5% | 83.8% | CTAGGTTTTCGTCGGG | GTG-----                                                           |
| 41            | hCoV-19/Kuwait/KU09/2020                   | EPI_ISL_416541 |  | 2020-03-02 | 83.1% | 80.3% | CTAGGTTTTCGTCGGG | GTG-----                                                           |
| 42            | hCoV-19/Lithuania/CHVir1632/2020           | EPI_ISL_416741 |  | 2020-02-02 | 85.1% | 84.4% | CTAGGTTTTCGTCGGG | GTGACC-----                                                        |
| 43            | hCoV-19/Luxembourg/LNS0158952/2020         | EPI_ISL_417534 |  | 2020-03-18 | 78.5% | 79.5% | CTAGGTTTTCGTCGGG | GTGACGAAAGGTAAGATGGAGACCTTGTCC-----                                |
| 44            | hCoV-19/Malaysia/188407/2020               | EPI_ISL_417918 |  | 2020-03-18 | 95.5% | 93.9% | CTAGGTTTTCGTCGGG | GTGACGAAAG-----                                                    |
| 45            | hCoV-19/Mexico/CDMX-IDNRE_01/2020          | EPI_ISL_412972 |  | 2020-02-27 | 78.9% | 79.6% | CTAGGTTTTCGTCGGG | -----                                                              |
| 46            | hCoV-19/Nanchang/XZ216/2020                | EPI_ISL_417420 |  | 2020-03-23 | 91.7% | 90.2% | CTAGGTTTTCGTCGGG | GTGACGAAAGGTAAGATGGAG-----                                         |
| 47            | hCoV-19/Nepal/61/2020                      | EPI_ISL_410301 |  | 2020-01-13 | 90.1% | 86.1% | CTAGGTTTTCGTCGGG | GTGACGAAAGGTAAGAT-----                                             |
| 48            | hCoV-19/Netherlands/Utrecht_1/2020         | EPI_ISL_414435 |  | 2020-03-03 | 96.3% | 97.5% | CTAGGTTTTCGTCGGG | GTGACGAAAGGTAAGATGGAGACCTTGTCC-----                                |
| 49            | hCoV-19/New_Zealand/01/2020                | EPI_ISL_413490 |  | 2020-02-27 | 97.9% | 95.9% | CTAGGTTTTCGTCGGG | GTGACGAAAGGTAAGATGGAGACCTTGTCCCTGGTTTCAACGAGAAAAAC-----            |
| 50            | hCoV-19/Nonthaburi/61/2020                 | EPI_ISL_403962 |  | 2020-01-08 | 86.4% | 84.2% | CTAGGTTTTCGTCGGG | GTGACGAA-----                                                      |
| 51            | hCoV-19/Norway/1379/2020                   | EPI_ISL_417483 |  | 2020-02-27 | 85.5% | 82.7% | CTAGGTTTTCGTCGGG | GTGACCG-----                                                       |
| 52            | hCoV-19/Pakistan/Gilgit1/2020              | EPI_ISL_417444 |  | 2020-03-04 | 95.5% | 94.7% | CTAGGTTTTCGTCGGG | GTGACGAAAGGTAAGATGGAGACCTTGTCC-----                                |
| 53            | hCoV-19/Panama/328677/2020                 | EPI_ISL_415152 |  | 2020-03-06 | 81.8% | 79.8% | CTAGGTTTTCGTCGGG | -----                                                              |
| 54            | hCoV-19/pangolin/Guangdong/1/2019          | EPI_ISL_410721 |  | 2019       | 81.4% | 78.9% | CTAGGTTTTCGTCGGG | -----                                                              |
| 55            | hCoV-19/Peru/010/2020                      | EPI_ISL_415787 |  | 2020-03-10 | 87.6% | 84.1% | CTAGGTTTTCGTCGGG | GTGACGAAAGG-----                                                   |
| 56            | hCoV-19/Poland/PL_P1/2020                  | EPI_ISL_416488 |  | 2020-03-03 | 82.2% | 79.4% | CTAGGTTTTCGTCGGG | -----                                                              |
| 57            | hCoV-19/Portugal/CV62/2020                 | EPI_ISL_413647 |  | 2020-03-01 | 83.1% | 80.2% | CTAGGTTTTCGTCGGG | -----                                                              |
| 58            | hCoV-19/Russia/StPetersburg-3524/2020      | EPI_ISL_415710 |  | 2020-03-15 | 77.3% | 79.2% | CTAG-----        | -----                                                              |
| 59            | hCoV-19/Saudi_Arabia/KAIMRC-Alghoribi/2020 | EPI_ISL_416432 |  | 2020-03-07 | 72.7% | 76.2% | CTAGGTTTTCGTCGGG | GTGACGAAAGGTAAGATGGAGACCTTGTCCCTGGTTTCAACGAGAAAAAC-----            |
| 60            | hCoV-19/Scotland/CVR05/2020                | EPI_ISL_414027 |  | 2020-03-04 | 97.9% | 96.3% | CTAGGTTTTCGTCGGG | GTGACGAAAGGTAAGATGGAGACCTTGTCCCTGGTTTCAACGAGAAAAAC-----            |
| 61            | hCoV-19/Senegal/003/2020                   | EPI_ISL_418206 |  | 2020-02-28 | 96.7% | 95.5% | CTAGGTTTTCGTCGGG | GTGACGAAAGGTAAGATGGAGACCTTGTCCCT-----                              |
| 62            | hCoV-19/Shandong/IVDC-SD-001/2020          | EPI_ISL_408482 |  | 2020-01-19 | 83.9% | 84.2% | CTAGGTTTTCGTCGGG | GTG-----                                                           |
| 63            | hCoV-19/Shanghai/SH0002/2020               | EPI_ISL_416316 |  | 2020-01-25 | 93.4% | 91.8% | CTAGGTTTTCGTCGGG | GTGACGAAAGGTAAGATGGAGACCTTGTCCCTGGTTTCAACGAGAAAAAC-----            |
| 64            | hCoV-19/Shenzhen/HKU-SZ-002/2020           | EPI_ISL_406030 |  | 2020-01-10 | 92.6% | 92.5% | CTAGGTTTTCGTCGGG | GTGACGAAAGGTAAGATGGAGAG-----                                       |
| 65            | hCoV-19/Shichuan/IVDC-SC-001/2020          | EPI_ISL_408484 |  | 2020-01-15 | 85.5% | 85.5% | CTAGGTTTTCGTCGGG | GTGACCG-----                                                       |
| 66            | hCoV-19/Singapore/1/2020                   | EPI_ISL_406973 |  | 2020-01-23 | 82.6% | 79.9% | CTAGGTTTTCGTCGGG | -----                                                              |
| 67            | hCoV-19/Slovakia/SK-BMCL1/2020             | EPI_ISL_417877 |  | 2020-03-06 | 81.4% | 80.7% | CTAGGTTTTCGTCGGG | -----                                                              |
| 68            | hCoV-19/South_Africa/R03006-20/2020        | EPI_ISL_417186 |  | 2020-03-07 | 78.1% | 79.4% | CTAGGTTTTCGTCGGG | -----                                                              |
| 69            | hCoV-19/South_Korea/KMCO3/2020             | EPI_ISL_407193 |  | 2020-01-25 | 91.3% | 90.9% | CTAGGTTTTCGTCGGG | GTGACGAAAGGTAAGATGGAGACCTTGTCCCTGGTTTCAACGAGAAAAAC-----            |
| 70            | hCoV-19/Spain/Madrid_H10_39/2020           | EPI_ISL_417963 |  | 2020-03-12 | 95.9% | 96.3% | CTAGGTTTTCGTCGGG | GTGACGAAAGGTAAGATGGAGACCTTGTCC-----                                |
| 71            | hCoV-19/Sweden/01/2020                     | EPI_ISL_411951 |  | 2020-02-07 | 83.5% | 80.1% | CTAGGTTTTCGTCGGG | GTG-----                                                           |
| 72            | hCoV-19/Switzerland/1000477377/2020        | EPI_ISL_413020 |  | 2020-02-27 | 78.1% | 79.4% | CTAGGTTTTCGTCGGG | GTGACC-----                                                        |
| 73            | hCoV-19/Taiwan/2/2020                      | EPI_ISL_406031 |  | 2020-01-23 | 85.1% | 81.3% | CTAGGTTTTCGTCGGG | GTGACC-----                                                        |
| 74            | hCoV-19/USA/AZ1/2020                       | EPI_ISL_406223 |  | 2020-01-22 | 84.3% | 80.2% | CTAGGTTTTCGTCGGG | GTGTA-----                                                         |
| 75            | hCoV-19/Vietnam/19-01S/2020                | EPI_ISL_418269 |  | 2020-01-22 | 81.4% | 79.7% | CTAGGTTTTCGTCGGG | -----                                                              |
| 76            | hCoV-19/Wales/PHW04/2020                   | EPI_ISL_415041 |  | 2020-03-07 | 97.9% | 95.2% | CTAGGTTTTCGTCGGG | GTGACGAAAGGTAAGATGGAGACCTTGTCCCTGGTTTCAACGAGAAAAACACA-----         |
| 77            | hCoV-19/Wuhan/HBCDC-HB-01/2019             | EPI_ISL_402132 |  | 2019-12-30 | 84.7% | 84.0% | CTAGGTTTTCGTCGGG | GTGACC-----                                                        |
| 78            | hCoV-19/Wuhan-Hu-1/2019                    | EPI_ISL_402125 |  | 2019-12-31 | 83.1% | 80.0% | CTAGGTTTTCGTCGGG | -----                                                              |
| 79            | hCoV-19/Yunnan/IVDC-YN-003/2020            | EPI_ISL_408480 |  | 2020-01-17 | 82.2% | 81.8% | CTAGGTTTTCGTCGGG | -----                                                              |
| 80            | hCoV-19/Zhejiang/WZ-01/2020                | EPI_ISL_404227 |  | 2020-01-16 | 89.3% | 87.4% | CTAGGTTTTCGTCGGG | GTGACGAAAGGTAAG-----                                               |
| consensus/10% |                                            |                |  |            |       |       | CTAGGTTTTCGTCGGG | -----                                                              |
| consensus/90% |                                            |                |  |            |       |       | CTAGGTTTTCGTCGGG | -----                                                              |
| consensus/80% |                                            |                |  |            |       |       | CTAGGTTTTCGTCGGG | -----                                                              |
| consensus/70% |                                            |                |  |            |       |       | CTAGGTTTTCGTCGGG | -----                                                              |

|    |                                           |                |  |            | cov    | pid    | 321   |       |       | 4     |       |       | 400   |
|----|-------------------------------------------|----------------|--|------------|--------|--------|-------|-------|-------|-------|-------|-------|-------|
| 1  | hCoV-19/Algeria/G0638_2264/2020           | EPI_ISL_418241 |  | 2020-03-02 | 100.0% | 100.0% | ----- | ----- | ----- | ----- | ----- | ----- | ----- |
| 2  | hCoV-19/Australia/NSW01/2020              | EPI_ISL_407893 |  | 2020-01-24 | 97.9%  | 96.3%  | ----- | ----- | ----- | ----- | ----- | ----- | ----- |
| 3  | hCoV-19/bat/Yunnan/RatG13/2013            | EPI_ISL_402131 |  | 2013-07-24 | 86.4%  | 84.4%  | ----- | ----- | ----- | ----- | ----- | ----- | ----- |
| 4  | hCoV-19/Beijing/105/2020                  | EPI_ISL_413518 |  | 2020-01-26 | 82.6%  | 79.9%  | ----- | ----- | ----- | ----- | ----- | ----- | ----- |
| 5  | hCoV-19/Belgium/BA-02291/2020             | EPI_ISL_415159 |  | 2020-02-29 | 90.9%  | 90.2%  | ----- | ----- | ----- | ----- | ----- | ----- | ----- |
| 6  | hCoV-19/Brazil/AMBR-02/2020               | EPI_ISL_417034 |  | 2020-03-16 | 100.0% | 98.0%  | ----- | ----- | ----- | ----- | ----- | ----- | ----- |
| 7  | hCoV-19/Cambodia/188407/2020              | EPI_ISL_417918 |  | 2020-03-18 | 82.2%  | 79.4%  | ----- | ----- | ----- | ----- | ----- | ----- | ----- |
| 8  | hCoV-19/Canada/BCC_02421/2020             | EPI_ISL_415561 |  | 2020-03-01 | 97.9%  | 96.3%  | ----- | ----- | ----- | ----- | ----- | ----- | ----- |
| 9  | hCoV-19/Chile/Santiago_op2d1/2020         | EPI_ISL_415658 |  | 2020-03-06 | 97.5%  | 97.9%  | ----- | ----- | ----- | ----- | ----- | ----- | ----- |
| 10 | hCoV-19/China/IQT001/2020                 | EPI_ISL_412966 |  | 2020-02-05 | 81.0%  | 78.6%  | ----- | ----- | ----- | ----- | ----- | ----- | ----- |
| 11 | hCoV-19/China/WHU02/2020                  | EPI_ISL_406717 |  | 2020-01-02 | 83.1%  | 80.3%  | ----- | ----- | ----- | ----- | ----- | ----- | ----- |
| 12 | hCoV-19/Chongqing/IVDC-CQ-001/2020        | EPI_ISL_408481 |  | 2020-01-18 | 81.4%  | 82.0%  | ----- | ----- | ----- | ----- | ----- | ----- | ----- |
| 13 | hCoV-19/Congo/108/2020                    | EPI_ISL_417948 |  | 2020-03-19 | 85.1%  | 82.1%  | ----- | ----- | ----- | ----- | ----- | ----- | ----- |
| 14 | hCoV-19/Denmark/SSI-01/2020               | EPI_ISL_416142 |  | 2020-02-26 | 91.7%  | 90.2%  | ----- | ----- | ----- | ----- | ----- | ----- | ----- |
| 15 | hCoV-19/England/01/2020                   | EPI_ISL_407071 |  | 2020-01-29 | 85.1%  | 82.0%  | ----- | ----- | ----- | ----- | ----- | ----- | ----- |
| 16 | hCoV-19/Finland/1/2020                    | EPI_ISL_407079 |  | 2020-01-29 | 88.4%  | 84.9%  | ----- | ----- | ----- | ----- | ----- | ----- | ----- |
| 17 | hCoV-19/Foshan/20SF207/2020               | EPI_ISL_406534 |  | 2020-01-22 | 90.9%  | 89.0%  | ----- | ----- | ----- | ----- | ----- | ----- | ----- |
| 18 | hCoV-19/France/ARA094100/2020             | EPI_ISL_418412 |  | 2020-03-15 | 85.5%  | 84.8%  | ----- | ----- | ----- | ----- | ----- | ----- | ----- |
| 19 | hCoV-19/Fujian/13/2020                    | EPI_ISL_411066 |  | 2020-01-22 | 83.5%  | 80.1%  | ----- | ----- | ----- | ----- | ----- | ----- | ----- |
| 20 | hCoV-19/Gaetgia/Tb/2020                   | EPI_ISL_416482 |  | 2020-03-13 | 84.3%  | 81.6%  | ----- | ----- | ----- | ----- | ----- | ----- | ----- |
| 21 | hCoV-19/Germany/Baden-Wuerttemberg-1/2020 | EPI_ISL_412912 |  | 2020-02-25 | 95.0%  | 99.1%  | ----- | ----- | ----- | ----- | ----- | ----- | ----- |
| 22 | hCoV-19/Germany/BavPat1/2020              | EPI_ISL_406862 |  | 2020-01-28 | 97.9%  | 96.7%  | ----- | ----- | ----- | ----- | ----- | ----- | ----- |
| 23 | hCoV-19/Germany/NRW-01/2020               | EPI_ISL_413488 |  | 2020-02-28 | 97.9%  | 95.9%  | ----- | ----- | ----- | ----- | ----- | ----- | ----- |
| 24 | hCoV-19/Greece/10/2020                    | EPI_ISL_418263 |  | 2020-03-18 | 83.5%  | 80.5%  | ----- | ----- | ----- | ----- | ----- | ----- | ----- |
| 25 | hCoV-19/Guangdong/2020XN4243-P0035/2020   | EPI_ISL_413853 |  | 2020-01-30 | 85.5%  | 88.0%  | ----- | ----- | ----- | ----- | ----- | ----- | ----- |
| 26 | hCoV-19/Guangzhou/20SF206/2020            | EPI_ISL_406533 |  | 2020-01-22 | 89.7%  | 88.9%  | ----- | ----- | ----- | ----- | ----- | ----- | ----- |
| 27 | hCoV-19/Hangzhou/HZ-1/2020                | EPI_ISL_406970 |  | 2020-01-20 | 83.1%  | 81.0%  | ----- | ----- | ----- | ----- | ----- | ----- | ----- |
| 28 | hCoV-19/Hefei/2/2020                      | EPI_ISL_412026 |  | 2020-02-23 | 84.3%  | 80.2%  | ----- | ----- | ----- | ----- | ----- | ----- | ----- |
| 29 | hCoV-19/Hong_Kong/Casel_21012020/2020     | EPI_ISL_417176 |  | 2020-01-21 | 97.5%  | 99.6%  | ----- | ----- | ----- | ----- | ----- | ----- | ----- |
| 30 | hCoV-19/Hungary/2/2020                    | EPI_ISL_418183 |  | 2020-03-   |        |        |       |       |       |       |       |       |       |

|    |                                                                      |        |        |           |
|----|----------------------------------------------------------------------|--------|--------|-----------|
| 64 | hCoV-19/Shenzhen/HKU-SZ-002/2020 EPI_ISL_406030 2020-01-10           | 92.6%  | 92.5%  | -----     |
| 65 | hCoV-19/Sichuan/IVDC-SC-001/2020 EPI_ISL_408484 2020-01-15           | 85.5%  | 85.5%  | -----     |
| 66 | hCoV-19/Singapore/1/2020 EPI_ISL_406973 2020-01-23                   | 82.6%  | 79.9%  | -----     |
| 67 | hCoV-19/Slovakia/SK-BMCL/2020 EPI_ISL_417877 2020-03-06              | 81.4%  | 80.7%  | -----     |
| 68 | hCoV-19/South_Africa/R03006-20/2020 EPI_ISL_417186 2020-03-07        | 78.1%  | 79.4%  | -----     |
| 69 | hCoV-19/South_Korea/KCDC03/2020 EPI_ISL_407193 2020-01-25            | 91.3%  | 90.9%  | -----     |
| 70 | hCoV-19/Spain/Madrid_H10_39/2020 EPI_ISL_417963 2020-03-12           | 95.9%  | 96.3%  | -----     |
| 71 | hCoV-19/Sweden/01/2020 EPI_ISL_411951 2020-02-07                     | 83.5%  | 80.1%  | -----     |
| 72 | hCoV-19/Switzerland/1000477377/2020 EPI_ISL_413020 2020-02-27        | 78.1%  | 79.4%  | -----     |
| 73 | hCoV-19/Taiwan/2/2020 EPI_ISL_406031 2020-01-23                      | 85.1%  | 81.3%  | -----     |
| 74 | hCoV-19/USA/AZ1/2020 EPI_ISL_406223 2020-01-22                       | 84.3%  | 80.2%  | -----     |
| 75 | hCoV-19/Vietnam/19-01S/2020 EPI_ISL_418269 2020-01-22                | 81.4%  | 79.7%  | -----     |
| 76 | hCoV-19/Wales/PHW04/2020 EPI_ISL_415041 2020-03-07                   | 97.9%  | 95.2%  | -----     |
| 77 | hCoV-19/Wuhan/HBCCDC-HB-01/2019 EPI_ISL_402132 2019-12-30            | 84.7%  | 84.0%  | -----     |
| 78 | hCoV-19/Wuhan-Hu-1/2019 EPI_ISL_402125 2019-12-31                    | 83.1%  | 80.0%  | -----     |
| 79 | hCoV-19/Yunnan/IVDC-YN-003/2020 EPI_ISL_408480 2020-01-17            | 82.2%  | 81.8%  | -----     |
| 80 | hCoV-19/Zhejiang/WZ-01/2020 EPI_ISL_404227 2020-01-16                | 89.3%  | 87.4%  | -----     |
|    | consensus/100%                                                       | .....  | .....  | .....     |
|    | consensus/90%                                                        | .....  | .....  | .....     |
|    | consensus/80%                                                        | .....  | .....  | .....     |
|    | consensus/70%                                                        | .....  | .....  | .....     |
|    |                                                                      | cov    | pid    | 401 ] 403 |
| 1  | hCoV-19/Algeria/G0638_2264/2020 EPI_ISL_418241 2020-03-02            | 100.0% | 100.0% | ---       |
| 2  | hCoV-19/Australia/NSW01/2020 EPI_ISL_407893 2020-01-24               | 97.9%  | 96.3%  | ---       |
| 3  | hCoV-19/bat/Yunnan/RaTG13/2013 EPI_ISL_402131 2013-07-24             | 86.4%  | 84.4%  | ---       |
| 4  | hCoV-19/Beijing/105/2020 EPI_ISL_413518 2020-01-26                   | 82.6%  | 79.9%  | ---       |
| 5  | hCoV-19/Belgium/BA-02291/2020 EPI_ISL_415159 2020-02-29              | 90.9%  | 90.2%  | ---       |
| 6  | hCoV-19/Brazil/AMBR-02/2020 EPI_ISL_417034 2020-03-16                | 100.0% | 98.0%  | ---       |
| 7  | hCoV-19/Cambodia/0012/2020 EPI_ISL_411902 2020-01-27                 | 82.2%  | 80.2%  | ---       |
| 8  | hCoV-19/Canada/BC_02421/2020 EPI_ISL_415581 2020-03-01               | 97.9%  | 96.3%  | ---       |
| 9  | hCoV-19/Chile/Santiago_cp2d1/2020 EPI_ISL_415658 2020-03-06          | 97.5%  | 97.9%  | ---       |
| 10 | hCoV-19/China/IQT001/2020 EPI_ISL_412966 2020-02-05                  | 81.0%  | 78.6%  | ---       |
| 11 | hCoV-19/China/WHU02/2020 EPI_ISL_406717 2020-01-02                   | 83.1%  | 80.3%  | ---       |
| 12 | hCoV-19/Chongqing/IVDC-CQ-001/2020 EPI_ISL_408481 2020-01-18         | 81.4%  | 82.0%  | ---       |
| 13 | hCoV-19/Congo/108/2020 EPI_ISL_417948 2020-03-19                     | 85.1%  | 82.1%  | ---       |
| 14 | hCoV-19/Denmark/SSI-01/2020 EPI_ISL_416142 2020-02-26                | 91.7%  | 90.2%  | ---       |
| 15 | hCoV-19/England/01/2020 EPI_ISL_407071 2020-01-29                    | 85.1%  | 82.0%  | ---       |
| 16 | hCoV-19/Finland/1/2020 EPI_ISL_407079 2020-01-29                     | 88.4%  | 84.9%  | ---       |
| 17 | hCoV-19/Foshan/20SF207/2020 EPI_ISL_406534 2020-01-22                | 90.9%  | 89.0%  | ---       |
| 18 | hCoV-19/France/ARA094100/2020 EPI_ISL_418412 2020-03-15              | 85.5%  | 84.8%  | ---       |
| 19 | hCoV-19/Fujian/13/2020 EPI_ISL_411066 2020-01-22                     | 83.5%  | 80.1%  | ---       |
| 20 | hCoV-19/Georgia/Tb/2020 EPI_ISL_416482 2020-03-13                    | 84.3%  | 81.6%  | ---       |
| 21 | hCoV-19/Germany/Baden-Wuerttemberg-1/2020 EPI_ISL_412912 2020-02-25  | 95.0%  | 99.1%  | ---       |
| 22 | hCoV-19/Germany/BavPat1/2020 EPI_ISL_416062 2020-01-28               | 97.9%  | 96.7%  | ---       |
| 23 | hCoV-19/Germany/NRW-01/2020 EPI_ISL_413488 2020-02-28                | 97.9%  | 95.9%  | ---       |
| 24 | hCoV-19/Greece/10/2020 EPI_ISL_418263 2020-03-18                     | 83.5%  | 80.5%  | ---       |
| 25 | hCoV-19/Guangdong/2020XN4243-P0035/2020 EPI_ISL_413853 2020-01-30    | 85.5%  | 88.0%  | ---       |
| 26 | hCoV-19/Guangzhou/20SF206/2020 EPI_ISL_406533 2020-01-22             | 89.7%  | 88.9%  | ---       |
| 27 | hCoV-19/Hangzhou/HZ-1/2020 EPI_ISL_406970 2020-01-20                 | 83.1%  | 81.0%  | ---       |
| 28 | hCoV-19/Hefei/2/2020 EPI_ISL_412026 2020-02-23                       | 84.3%  | 80.2%  | ---       |
| 29 | hCoV-19/Hong_Kong/Casell_21012020/2020 EPI_ISL_417176 2020-01-21     | 97.5%  | 99.6%  | ---       |
| 30 | hCoV-19/Hungary/2/2020 EPI_ISL_418183 2020-03-17                     | 97.9%  | 94.4%  | ---       |
| 31 | hCoV-19/Iceland/1/2020 EPI_ISL_417535 2020-03-13                     | 87.2%  | 84.1%  | ---       |
| 32 | hCoV-19/India/1-31/2020 EPI_ISL_413523 2020-01-31                    | 91.3%  | 88.0%  | ---       |
| 33 | hCoV-19/Ireland/21023/2020 EPI_ISL_418516 2020-03-06                 | 81.8%  | 78.1%  | ---       |
| 34 | hCoV-19/Israel/ISR_IT0320/2020 EPI_ISL_419210 2020-03                | 79.8%  | 78.5%  | ---       |
| 35 | hCoV-19/Italy/SPI1/2020 EPI_ISL_412974 2020-01-29                    | 83.1%  | 80.0%  | ---       |
| 36 | hCoV-19/Japan/DP0005/2020 EPI_ISL_416565 2020-02-15                  | 88.4%  | 85.9%  | ---       |
| 37 | hCoV-19/Jiangsu/JS01/2020 EPI_ISL_411950 2020-01-23                  | 82.2%  | 79.8%  | ---       |
| 38 | hCoV-19/Jiangsu/JS02/2020 EPI_ISL_411952 2020-01-24                  | 82.2%  | 79.8%  | ---       |
| 39 | hCoV-19/Jiangxi/IVDC-JX-002/2020 EPI_ISL_408486 2020-01-11           | 85.5%  | 85.5%  | ---       |
| 40 | hCoV-19/Jingzhou/HBCCDC-HB-01/2020 EPI_ISL_412459 2020-01-08         | 83.5%  | 83.8%  | ---       |
| 41 | hCoV-19/Kuwait/KU09/2020 EPI_ISL_416541 2020-03-02                   | 83.1%  | 80.3%  | ---       |
| 42 | hCoV-19/Lithuania/ChVir1632/2020 EPI_ISL_416741 2020-02              | 85.1%  | 84.4%  | ---       |
| 43 | hCoV-19/Luxembourg/LNS0158952/2020 EPI_ISL_417534 2020-03-18         | 78.5%  | 79.5%  | ---       |
| 44 | hCoV-19/Malaysia/188407/2020 EPI_ISL_417918 2020-03-18               | 95.5%  | 93.9%  | ---       |
| 45 | hCoV-19/Mexico/CDMX-INDRE_01/2020 EPI_ISL_412972 2020-02-27          | 78.9%  | 79.6%  | ---       |
| 46 | hCoV-19/NanChang/JX216/2020 EPI_ISL_417420 2020-03-23                | 91.7%  | 90.2%  | ---       |
| 47 | hCoV-19/Nepal/61/2020 EPI_ISL_410301 2020-01-13                      | 90.1%  | 86.1%  | ---       |
| 48 | hCoV-19/Netherlands/Utrecht_1/2020 EPI_ISL_414435 2020-03-03         | 96.3%  | 97.5%  | ---       |
| 49 | hCoV-19/New_Zealand/01/2020 EPI_ISL_413490 2020-02-27                | 97.9%  | 95.9%  | ---       |
| 50 | hCoV-19/Nonthaburi/61/2020 EPI_ISL_403962 2020-01-08                 | 86.4%  | 84.2%  | ---       |
| 51 | hCoV-19/Norway/1379/2020 EPI_ISL_417483 2020-02-27                   | 85.5%  | 82.7%  | ---       |
| 52 | hCoV-19/Pakistan/Gilgit1/2020 EPI_ISL_417444 2020-03-04              | 95.5%  | 94.7%  | ---       |
| 53 | hCoV-19/Panama/328677/2020 EPI_ISL_415152 2020-03-06                 | 81.8%  | 79.8%  | ---       |
| 54 | hCoV-19/pangolin/Guangdong/1/2019 EPI_ISL_410721 2019                | 81.4%  | 78.9%  | ---       |
| 55 | hCoV-19/Peru/010/2020 EPI_ISL_415787 2020-03-10                      | 87.6%  | 84.1%  | ---       |
| 56 | hCoV-19/Poland/PL_P1/2020 EPI_ISL_416488 2020-03-03                  | 82.2%  | 79.4%  | ---       |
| 57 | hCoV-19/Portugal/CV62/2020 EPI_ISL_413647 2020-03-01                 | 81.8%  | 80.2%  | ---       |
| 58 | hCoV-19/Russia/StPetersburg-3524/2020 EPI_ISL_415710 2020-03-15      | 77.3%  | 79.2%  | ---       |
| 59 | hCoV-19/Saudi_Arabia/KAIMRC-Alghoribi/2020 EPI_ISL_416432 2020-03-07 | 72.7%  | 76.2%  | ---       |
| 60 | hCoV-19/Scotland/CVR05/2020 EPI_ISL_414027 2020-03-04                | 97.9%  | 96.3%  | ---       |
| 61 | hCoV-19/Senegal/003/2020 EPI_ISL_418206 2020-02-28                   | 96.7%  | 95.5%  | ---       |
| 62 | hCoV-19/Shandong/IVDC-SD-001/2020 EPI_ISL_408482 2020-01-19          | 83.9%  | 84.2%  | ---       |
| 63 | hCoV-19/Shanghai/SH0002/2020 EPI_ISL_416316 2020-01-25               | 93.4%  | 91.8%  | ---       |
| 64 | hCoV-19/Shenzhen/HKU-SZ-002/2020 EPI_ISL_406030 2020-01-10           | 92.6%  | 92.5%  | ---       |
| 65 | hCoV-19/Sichuan/IVDC-SC-001/2020 EPI_ISL_408484 2020-01-15           | 85.5%  | 85.5%  | ---       |
| 66 | hCoV-19/Singapore/1/2020 EPI_ISL_406973 2020-01-23                   | 82.6%  | 79.9%  | ---       |
| 67 | hCoV-19/Slovakia/SK-BMCL/2020 EPI_ISL_417877 2020-03-06              | 81.4%  | 80.7%  | ---       |
| 68 | hCoV-19/South_Africa/R03006-20/2020 EPI_ISL_417186 2020-03-07        | 78.1%  | 79.4%  | ---       |
| 69 | hCoV-19/South_Korea/KCDC03/2020 EPI_ISL_407193 2020-01-25            | 91.3%  | 90.9%  | ---       |
| 70 | hCoV-19/Spain/Madrid_H10_39/2020 EPI_ISL_417963 2020-03-12           | 95.9%  | 96.3%  | ---       |
| 71 | hCoV-19/Sweden/01/2020 EPI_ISL_411951 2020-02-07                     | 83.5%  | 80.1%  | ---       |
| 72 | hCoV-19/Switzerland/1000477377/2020 EPI_ISL_413020 2020-02-27        | 78.1%  | 79.4%  | ---       |
| 73 | hCoV-19/Taiwan/2/2020 EPI_ISL_406031 2020-01-23                      | 85.1%  | 81.3%  | ---       |
| 74 | hCoV-19/USA/AZ1/2020 EPI_ISL_406223 2020-01-22                       | 84.3%  | 80.2%  | ---       |
| 75 | hCoV-19/Vietnam/19-01S/2020 EPI_ISL_418269 2020-01-22                | 81.4%  | 79.7%  | ---       |
| 76 | hCoV-19/Wales/PHW04/2020 EPI_ISL_415041 2020-03-07                   | 97.9%  | 95.2%  | ---       |
| 77 | hCoV-19/Wuhan/HBCCDC-HB-01/2019 EPI_ISL_402132 2019-12-30            | 84.7%  | 84.0%  | ---       |
| 78 | hCoV-19/Wuhan-Hu-1/2019 EPI_ISL_402125 2019-12-31                    | 83.1%  | 80.0%  | ---       |
| 79 | hCoV-19/Yunnan/IVDC-YN-003/2020 EPI_ISL_408480 2020-01-17            | 82.2%  | 81.8%  | ---       |
| 80 | hCoV-19/Zhejiang/WZ-01/2020 EPI_ISL_404227 2020-01-16                | 89.3%  | 87.4%  | ---       |
|    | consensus/100%                                                       | .....  | .....  | .....     |
|    | consensus/90%                                                        | .....  | .....  | .....     |
|    | consensus/80%                                                        | .....  | .....  | .....     |
|    | consensus/70%                                                        | .....  | .....  | .....     |
