# Supplementary material for: Potential use of noncoding RNAs and innovative therapeutic strategies to target the 5’UTR of SARS-CoV-2
Source: PubMed Central journal article supplement (PMC7466951; doi:10.2217/epi-2020-0162), 2020-09-02

# 5'UTR of all SARS-CoV isolates

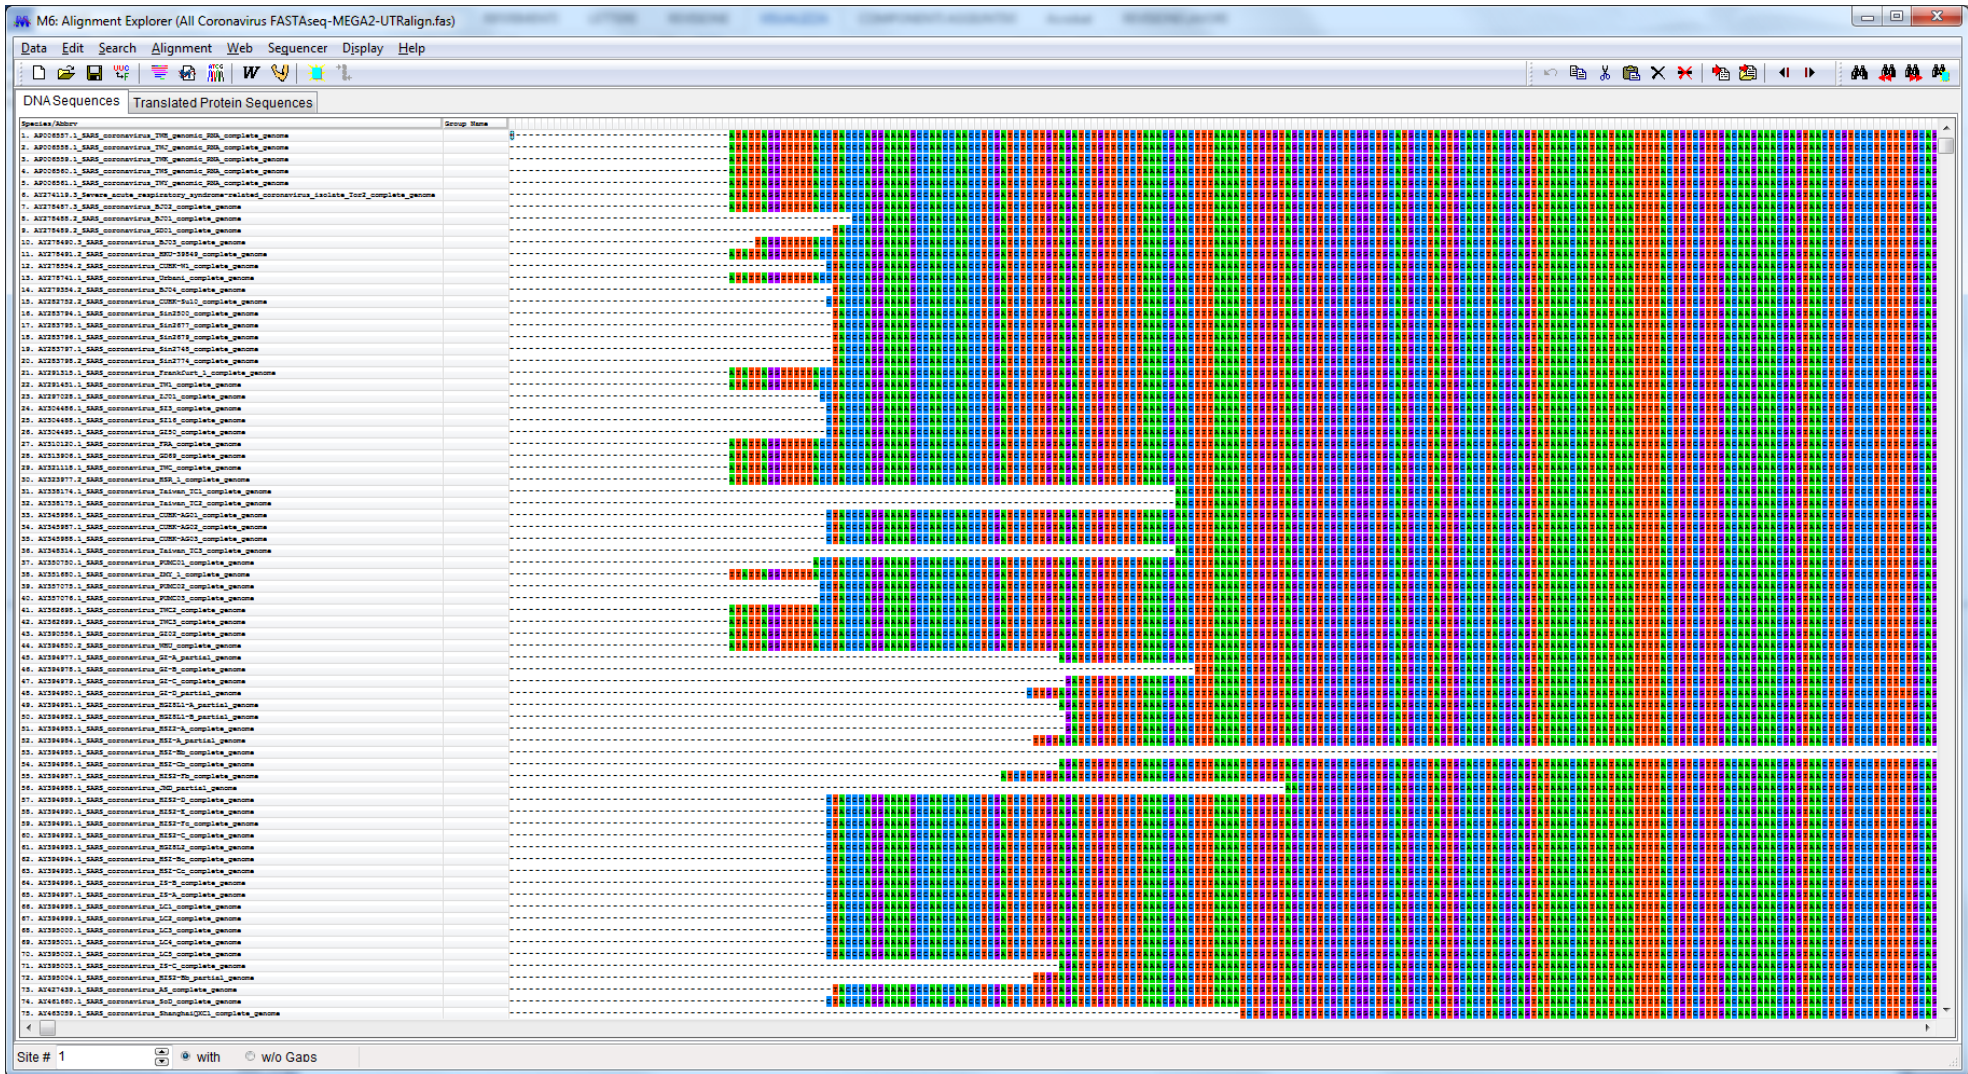

# 5'UTR of all SARS-CoV-2 isolates

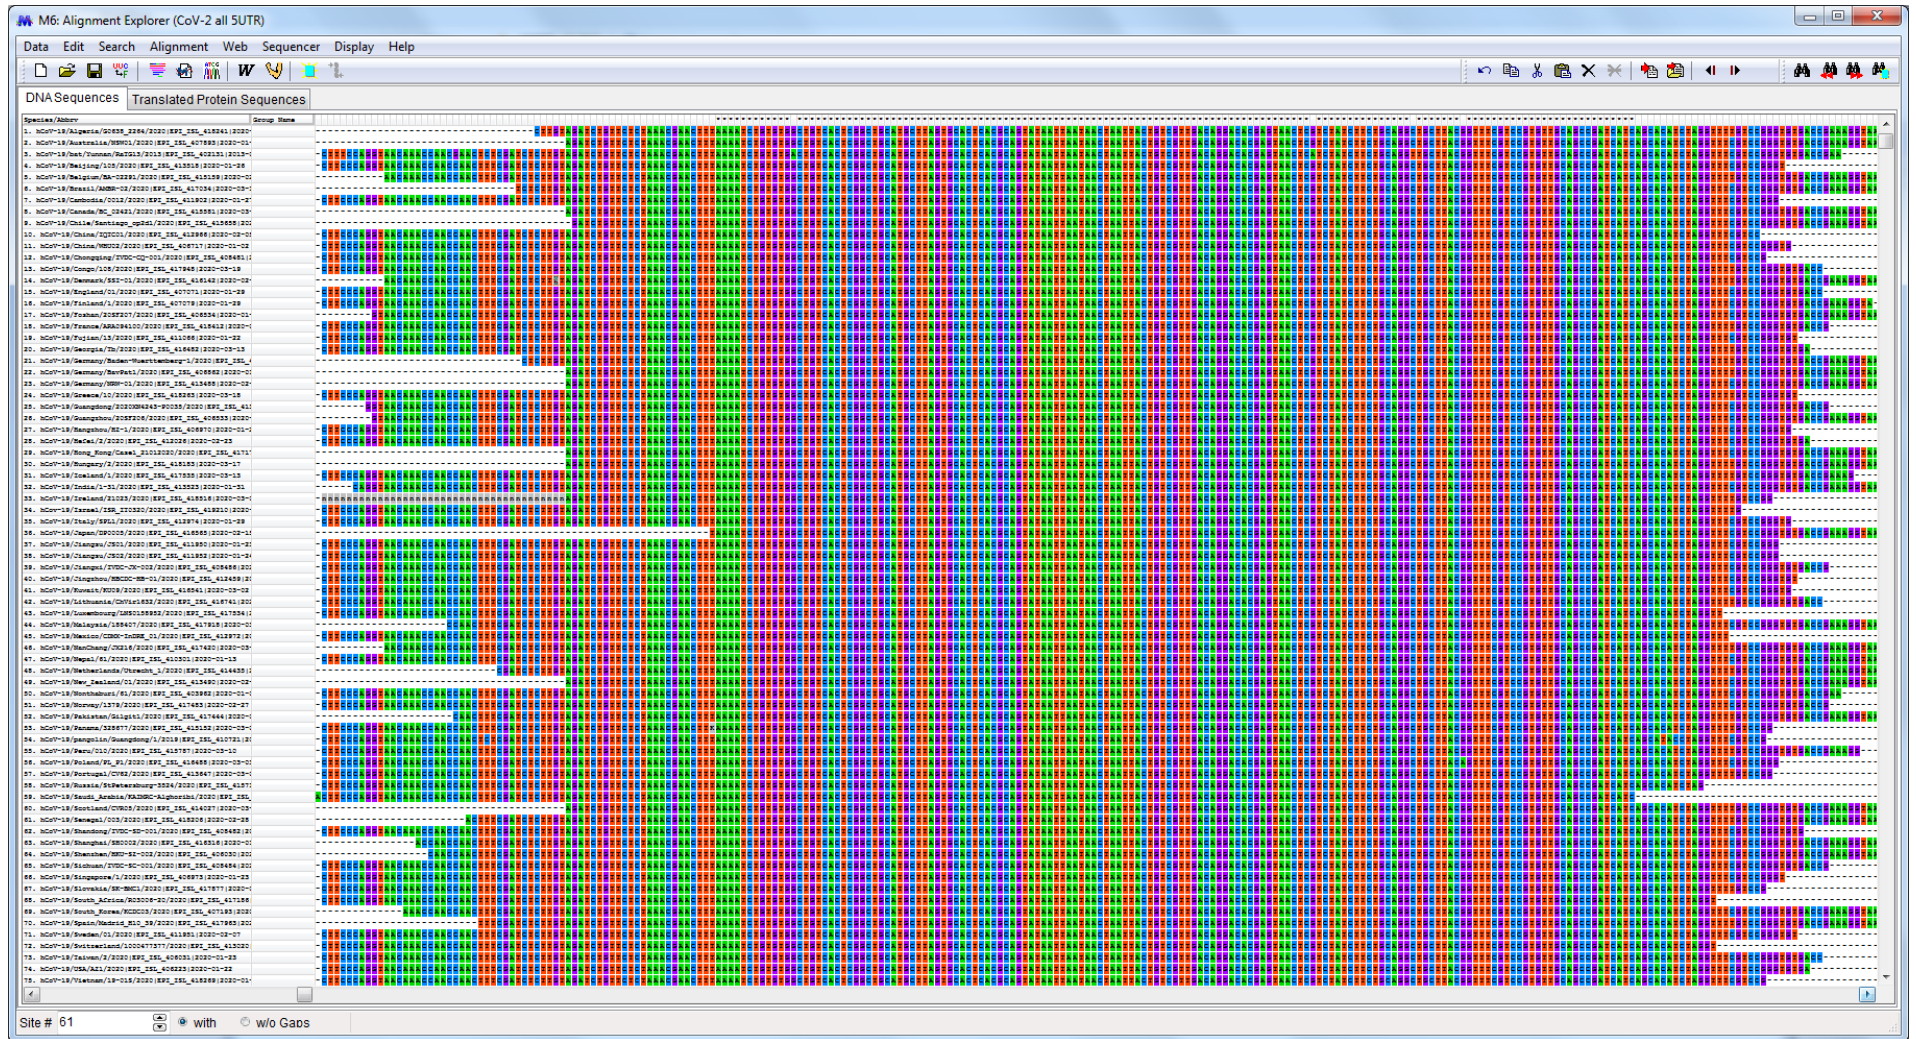

Supplement: epi-2020-0162-supp-table-3.pdf [file epi-2020-0162-supp-table-3.pdf]
